# Supplementary material
Source: PubMed Central journal article supplement (PMC1214672)
Supplement: aem_71_9_5544__1.pdf [file aem_71_9_5544__1.pdf]

**Table S1: Identity of ITS OTUs ( $\geq 97\%$  similar) and distribution across libraries**

| OTU | Bit Score | Kingdom or Subkingdom | Phylum        | Order or Subclass | Genus          | MH-L-1 | MH-L-2 | P-L-1 | MH-O-1 | MH-O-2 | MH-O-3 | MH-O-4 | MH-O-5 | MH-O-6 | P-O-1 | MH-A-1 | MH-A-2 | P-A-1 | MH-B-1 | P-B-1 | Sequence numbers                                                                                                                                                                                                                                                                                                                                                                                                                                                                                                                                                                                                                                                                                                                         |
|-----|-----------|-----------------------|---------------|-------------------|----------------|--------|--------|-------|--------|--------|--------|--------|--------|--------|-------|--------|--------|-------|--------|-------|------------------------------------------------------------------------------------------------------------------------------------------------------------------------------------------------------------------------------------------------------------------------------------------------------------------------------------------------------------------------------------------------------------------------------------------------------------------------------------------------------------------------------------------------------------------------------------------------------------------------------------------------------------------------------------------------------------------------------------------|
| 001 | 92        | Metazoa               |               |                   |                | 0      | 0      | 0     | 0      | 0      | 0      | 0      | 0      | 0      | 0     | 49     | 2      | 0     | 0      | 0     | dfmo1059_001, dfmo1059_002, dfmo1059_003, dfmo1059_007, dfmo1059_009, dfmo1059_010, dfmo1059_018, dfmo1059_021, dfmo1059_022, dfmo1059_023, dfmo1059_024, dfmo1059_025, dfmo1059_026, dfmo1059_031, dfmo1059_034, dfmo1059_035, dfmo1059_037, dfmo1059_038, dfmo1059_042, dfmo1059_046, dfmo1059_048, dfmo1059_051, dfmo1059_053, dfmo1059_055, dfmo1059_060, dfmo1059_061, dfmo1059_062, dfmo1059_065, dfmo1059_066, dfmo1059_069, dfmo1059_071, dfmo1059_072, dfmo1059_073, dfmo1059_074, dfmo1059_075, dfmo1059_084, dfmo1059_085, dfmo1059_087, dfmo1059_091, dfmo1059_095, dfmo1059_100, dfmo1059_101, dfmo1059_104, dfmo1059_105, dfmo1059_110, dfmo1059_111, dfmo1059_112, dfmo1059_113, dfmo1059_119, dfmo1059_135, dfmo1059_243 |
| 002 | 335       | Fungi                 | Ascomycota    |                   |                | 0      | 0      | 0     | 1      | 2      | 1      | 4      | 1      | 0      | 0     | 2      | 11     | 3     | 4      | 0     | dfmo0690_003, dfmo0690_039, dfmo0690_108, dfmo0690_124, dfmo0690_161, dfmo0690_180, dfmo0690_199, dfmo0690_207, dfmo0690_223, dfmo0725_034, dfmo0725_066, dfmo0725_067, dfmo1059_054, dfmo1059_077, dfmo1059_138, dfmo1059_147, dfmo1059_162, dfmo1059_176, dfmo1059_186, dfmo1059_189, dfmo1059_205, dfmo1059_212, dfmo1059_224, dfmo1059_235, dfmo1059_251, dfmo1060_005, dfmo1060_008, dfmo1060_035, dfmo1060_058                                                                                                                                                                                                                                                                                                                     |
| 003 | 728       | Fungi                 | Ascomycota    | Leotiomycetidae   |                | 4      | 13     | 0     | 0      | 1      | 0      | 0      | 0      | 0      | 0     | 0      | 0      | 0     | 0      | 8     | dfmo0688_015, dfmo0688_021, dfmo0688_034, dfmo0688_055, dfmo0688_058, dfmo0688_073, dfmo0688_074, dfmo0688_078, dfmo0688_088, dfmo0688_096, dfmo0688_099, dfmo0688_107, dfmo0688_131, dfmo0688_135, dfmo0688_150, dfmo0688_154, dfmo0688_174, dfmo0690_145, dfmo0726_050, dfmo0726_059, dfmo0726_061, dfmo0726_065, dfmo0726_070, dfmo0726_072, dfmo0726_074, dfmo0726_078                                                                                                                                                                                                                                                                                                                                                               |
| 004 | 339       | Fungi                 | Ascomycota    |                   |                | 2      | 3      | 0     | 0      | 4      | 0      | 2      | 0      | 0      | 0     | 1      | 0      | 0     | 4      | 0     | dfmo0688_004, dfmo0688_027, dfmo0688_090, dfmo0688_094, dfmo0688_153, dfmo0690_105, dfmo0690_123, dfmo0690_130, dfmo0690_143, dfmo0690_188, dfmo0690_200, dfmo1059_064, dfmo1060_009, dfmo1060_012, dfmo1060_016, dfmo1060_074                                                                                                                                                                                                                                                                                                                                                                                                                                                                                                           |
| 005 | 1281      | Fungi                 | Basidiomycota | Agaricales        | <i>Mycena</i>  | 2      | 9      | 1     | 0      | 0      | 0      | 0      | 0      | 0      | 0     | 0      | 0      | 0     | 0      | 3     | dfmo0688_007, dfmo0688_033, dfmo0688_064, dfmo0688_116, dfmo0688_120, dfmo0688_126, dfmo0688_134, dfmo0688_139, dfmo0688_157, dfmo0688_165, dfmo0688_170, dfmo0723_016, dfmo0726_054, dfmo0726_055, dfmo0726_079                                                                                                                                                                                                                                                                                                                                                                                                                                                                                                                         |
| 006 | 301       | Fungi                 | Basidiomycota |                   |                | 0      | 0      | 0     | 0      | 0      | 0      | 0      | 0      | 0      | 0     | 0      | 0      | 0     | 16     | 0     | dfmo1060_001, dfmo1060_010, dfmo1060_013, dfmo1060_014, dfmo1060_015, dfmo1060_024, dfmo1060_027, dfmo1060_033, dfmo1060_038, dfmo1060_039, dfmo1060_041, dfmo1060_046, dfmo1060_049, dfmo1060_059, dfmo1060_084, dfmo1060_107                                                                                                                                                                                                                                                                                                                                                                                                                                                                                                           |
| 007 | 1211      | Fungi                 | Basidiomycota |                   |                | 0      | 0      | 3     | 0      | 0      | 0      | 0      | 0      | 0      | 8     | 0      | 0      | 9     | 0      | 0     | dfmo0723_069, dfmo0723_101, dfmo0723_108, dfmo0724_001, dfmo0724_007, dfmo0724_014, dfmo0724_033, dfmo0724_034, dfmo0724_035, dfmo0724_054, dfmo0724_068, dfmo0725_003, dfmo0725_004, dfmo0725_016, dfmo0725_020, dfmo0725_025, dfmo0725_033, dfmo0725_037, dfmo0725_060, dfmo0725_096                                                                                                                                                                                                                                                                                                                                                                                                                                                   |
| 008 | 1209      | Fungi                 | Basidiomycota | Russulales        | <i>Russula</i> | 0      | 0      | 0     | 0      | 0      | 0      | 0      | 0      | 0      | 0     | 0      | 0      | 0     | 11     | 0     | dfmo0726_011, dfmo0726_026, dfmo0726_031, dfmo0726_038, dfmo0726_089, dfmo0726_100, dfmo0726_102, dfmo0726_104, dfmo0726_117, dfmo0726_120, dfmo0726_123                                                                                                                                                                                                                                                                                                                                                                                                                                                                                                                                                                                 |
| 009 | 630       | Fungi                 | Ascomycota    | Dothidiomycetidae |                | 5      | 3      | 0     | 0      | 0      | 0      | 0      | 0      | 0      | 0     | 0      | 1      | 0     | 0      | 1     | dfmo0688_016, dfmo0688_018, dfmo0688_019, dfmo0688_020, dfmo0688_026, dfmo0688_069, dfmo0688_110, dfmo0688_173, dfmo0726_088, dfmo1059_155                                                                                                                                                                                                                                                                                                                                                                                                                                                                                                                                                                                               |
| 010 | 375       | Fungi                 | Basidiomycota |                   |                | 0      | 0      | 0     | 0      | 2      | 0      | 0      | 1      | 7      | 0     | 0      | 0      | 0     | 0      | 0     | dfmo0690_038, dfmo0690_067, dfmo0690_069, dfmo0690_078, dfmo0690_080, dfmo0690_083, dfmo0690_089, dfmo0690_095, dfmo0690_114, dfmo0690_129                                                                                                                                                                                                                                                                                                                                                                                                                                                                                                                                                                                               |
| 011 | 155       | Fungi                 |               |                   |                | 0      | 0      | 0     | 0      | 0      | 0      | 0      | 0      | 0      | 0     | 0      | 0      | 0     | 10     | 0     | dfmo0726_008, dfmo0726_013, dfmo0726_017, dfmo0726_018, dfmo0726_033, dfmo0726_036, dfmo0726_103, dfmo0726_108, dfmo0726_118, dfmo0726_122                                                                                                                                                                                                                                                                                                                                                                                                                                                                                                                                                                                               |
| 012 | 396       | Fungi                 | Ascomycota    |                   |                | 0      | 0      | 0     | 0      | 2      | 1      | 1      | 0      | 0      | 1     | 3      | 2      | 0     | 0      | 0     | dfmo0690_041, dfmo0690_162, dfmo0690_170, dfmo0690_201, dfmo0725_099, dfmo0725_103, dfmo1059_114, dfmo1059_188, dfmo1059_191, dfmo1059_250                                                                                                                                                                                                                                                                                                                                                                                                                                                                                                                                                                                               |
| 013 | 359       | Fungi                 | Basidiomycota |                   |                | 0      | 0      | 0     | 0      | 0      | 0      | 0      | 0      | 0      | 0     | 0      | 0      | 9     | 0      | 0     | dfmo1060_019, dfmo1060_020, dfmo1060_043, dfmo1060_050, dfmo1060_052, dfmo1060_055, dfmo1060_056, dfmo1060_060, dfmo1060_089                                                                                                                                                                                                                                                                                                                                                                                                                                                                                                                                                                                                             |
| 014 | 1134      | Fungi                 |               |                   |                | 0      | 0      | 0     | 0      | 3      | 0      | 3      | 1      | 0      | 0     | 0      | 1      | 1     | 0      | 0     | dfmo0690_055, dfmo0690_106, dfmo0690_126, dfmo0690_140, dfmo0690_175, dfmo0690_204, dfmo0690_243, dfmo0725_064, dfmo1059_123                                                                                                                                                                                                                                                                                                                                                                                                                                                                                                                                                                                                             |

| OTU | Bit Score | Kingdom or Subkingdom | Phylum        | Order or Subclass | Genus                | MH-L-1 | MH-L-2 | P-L-1 | MH-O-1 | MH-O-2 | MH-O-3 | MH-O-4 | MH-O-5 | MH-O-6 | P-O-1 | MH-A-1 | MH-A-2 | P-A-1 | MH-B-1 | P-B-1 | Sequence numbers |                                                                                                                              |
|-----|-----------|-----------------------|---------------|-------------------|----------------------|--------|--------|-------|--------|--------|--------|--------|--------|--------|-------|--------|--------|-------|--------|-------|------------------|------------------------------------------------------------------------------------------------------------------------------|
| 015 | 809       | Fungi                 | Ascomycota    | Leotiomycetidae   | <i>Phialophora</i>   | 0      | 3      | 0     | 1      | 1      | 0      | 0      | 1      | 0      | 0     | 0      | 0      | 0     | 0      | 0     | 3                | dfmo0688_082, dfmo0688_102, dfmo0688_152, dfmo0690_024, dfmo0690_034, dfmo0690_133, dfmo0726_056, dfmo0726_069, dfmo0726_071 |
| 016 | 987       | Fungi                 | Basidiomycota | Polyporales       | <i>Tylospora</i>     | 0      | 0      | 0     | 1      | 0      | 1      | 2      | 3      | 0      | 0     | 0      | 0      | 0     | 0      | 0     | 1                | dfmo0690_001, dfmo0690_037, dfmo0690_050, dfmo0690_060, dfmo0690_166, dfmo0690_177, dfmo0690_184, dfmo0726_081               |
| 017 | 335       | Fungi                 | Ascomycota    |                   |                      | 0      | 0      | 0     | 0      | 0      | 0      | 0      | 0      | 0      | 0     | 0      | 0      | 0     | 0      | 0     | 8                | dfmo0726_012, dfmo0726_025, dfmo0726_029, dfmo0726_034, dfmo0726_035, dfmo0726_039, dfmo0726_099, dfmo0726_113               |
| 018 | 906       | Fungi                 | Ascomycota    |                   |                      | 0      | 1      | 0     | 0      | 2      | 0      | 1      | 0      | 0      | 0     | 0      | 4      | 0     | 0      | 0     | 0                | dfmo0688_169, dfmo0690_136, dfmo0690_151, dfmo0690_244, dfmo1059_139, dfmo1059_149, dfmo1059_157, dfmo1059_195               |
| 019 | 837       | Fungi                 | Ascomycota    | Leotiomycetidae   |                      | 0      | 0      | 0     | 0      | 1      | 0      | 3      | 2      | 0      | 2     | 0      | 0      | 0     | 0      | 0     | 0                | dfmo0690_033, dfmo0690_053, dfmo0690_112, dfmo0690_187, dfmo0690_198, dfmo0690_235, dfmo0724_082, dfmo0724_083               |
| 020 | 583       | Fungi                 | Basidiomycota | Agaricales        |                      | 3      | 2      | 0     | 0      | 1      | 0      | 0      | 0      | 0      | 0     | 0      | 0      | 0     | 0      | 0     | 2                | dfmo0688_029, dfmo0688_038, dfmo0688_049, dfmo0688_124, dfmo0688_172, dfmo0690_139, dfmo0726_052, dfmo0726_076               |
| 021 | 569       | Fungi                 | Ascomycota    | Leotiomycetidae   |                      | 5      | 0      | 0     | 0      | 0      | 0      | 1      | 0      | 0      | 0     | 0      | 1      | 0     | 0      | 0     | 0                | dfmo0688_002, dfmo0688_003, dfmo0688_005, dfmo0688_006, dfmo0688_039, dfmo0690_059, dfmo1059_126                             |
| 022 | 908       | Fungi                 | Basidiomycota | Russulales        | <i>Russula</i>       | 0      | 0      | 0     | 0      | 0      | 0      | 0      | 0      | 0      | 0     | 0      | 0      | 7     | 0      | 0     | 0                | dfmo0725_015, dfmo0725_027, dfmo0725_056, dfmo0725_058, dfmo0725_069, dfmo0725_080, dfmo0725_098                             |
| 023 | 1031      | Fungi                 |               |                   |                      | 0      | 0      | 0     | 0      | 0      | 1      | 0      | 0      | 0      | 0     | 3      | 1      | 1     | 1      | 0     | 0                | dfmo0690_222, dfmo0725_009, dfmo1059_013, dfmo1059_014, dfmo1059_056, dfmo1059_213, dfmo1060_003                             |
| 024 | 274       | Fungi                 | Basidiomycota |                   |                      | 0      | 0      | 4     | 0      | 0      | 0      | 2      | 0      | 0      | 0     | 0      | 0      | 0     | 0      | 0     | 0                | dfmo0690_214, dfmo0690_224, dfmo0723_039, dfmo0723_044, dfmo0723_045, dfmo0723_100                                           |
| 025 | 977       | Fungi                 | Ascomycota    | Dothidiomycetidae | <i>Alternaria</i>    | 3      | 1      | 1     | 0      | 0      | 0      | 0      | 0      | 0      | 0     | 0      | 0      | 0     | 0      | 0     | 0                | dfmo0688_031, dfmo0688_046, dfmo0688_047, dfmo0688_122, dfmo0723_065                                                         |
| 026 | 662       | Fungi                 | Ascomycota    |                   |                      | 0      | 1      | 0     | 0      | 1      | 0      | 2      | 0      | 0      | 0     | 0      | 1      | 0     | 0      | 0     | 0                | dfmo0688_075, dfmo0690_135, dfmo0690_213, dfmo0690_228, dfmo1059_211                                                         |
| 027 | 339       | Fungi                 | Ascomycota    |                   |                      | 0      | 0      | 0     | 0      | 0      | 0      | 0      | 0      | 0      | 0     | 2      | 1      | 1     | 1      | 0     | 0                | dfmo0725_076, dfmo1059_032, dfmo1059_096, dfmo1059_197, dfmo1060_066                                                         |
| 028 | 841       | Fungi                 | Basidiomycota | Agaricales        | <i>Hygrocybe</i>     | 0      | 0      | 0     | 0      | 0      | 0      | 0      | 0      | 0      | 0     | 0      | 3      | 2     | 0      | 0     | 0                | dfmo0725_077, dfmo0725_078, dfmo1059_125, dfmo1059_209, dfmo1059_210                                                         |
| 029 | 852       | Fungi                 | Zygomycota    |                   |                      | 0      | 0      | 0     | 0      | 0      | 0      | 0      | 0      | 0      | 0     | 0      | 1      | 2     | 0      | 2     | 0                | dfmo0725_038, dfmo0725_040, dfmo0726_090, dfmo0726_132, dfmo1059_226                                                         |
| 030 | 418       | Fungi                 | Basidiomycota | Ceratobasidiales  |                      | 0      | 0      | 0     | 0      | 0      | 0      | 0      | 0      | 0      | 0     | 1      | 2      | 0     | 2      | 0     | 0                | dfmo1059_063, dfmo1059_178, dfmo1059_208, dfmo1060_018, dfmo1060_087                                                         |
| 031 | 688       | Fungi                 | Ascomycota    |                   |                      | 0      | 0      | 5     | 1      | 0      | 0      | 0      | 0      | 0      | 0     | 0      | 0      | 0     | 0      | 0     | 0                | dfmo0690_025, dfmo0723_030, dfmo0723_046, dfmo0723_060, dfmo0723_071, dfmo0723_090                                           |
| 032 | 127       | Fungi                 |               |                   |                      | 0      | 0      | 0     | 1      | 1      | 0      | 3      | 0      | 0      | 0     | 0      | 0      | 0     | 0      | 0     | 0                | dfmo0690_008, dfmo0690_119, dfmo0690_190, dfmo0690_219, dfmo0690_225                                                         |
| 033 | 90        | Metazoa               |               |                   |                      | 0      | 0      | 0     | 0      | 0      | 0      | 0      | 0      | 0      | 0     | 4      | 1      | 0     | 0      | 0     | 0                | dfmo1059_070, dfmo1059_093, dfmo1059_106, dfmo1059_116, dfmo1059_256                                                         |
| 034 | 743       | Fungi                 | Basidiomycota | Agaricales        |                      | 0      | 2      | 1     | 0      | 0      | 0      | 1      | 0      | 0      | 0     | 0      | 0      | 0     | 0      | 0     | 0                | dfmo0688_127, dfmo0688_138, dfmo0690_045, dfmo0723_040                                                                       |
| 035 | 694       | Fungi                 | Ascomycota    | Leotiomycetidae   |                      | 0      | 2      | 0     | 0      | 0      | 0      | 0      | 0      | 0      | 0     | 0      | 0      | 0     | 0      | 2     | 0                | dfmo0688_092, dfmo0688_161, dfmo0726_053, dfmo0726_063                                                                       |
| 036 | 897       | Fungi                 | Ascomycota    | Dothidiomycetidae | <i>Aureobasidium</i> | 0      | 0      | 0     | 1      | 0      | 1      | 0      | 0      | 0      | 0     | 0      | 0      | 0     | 2      | 0     | 0                | dfmo0690_007, dfmo0690_158, dfmo1060_021, dfmo1060_057                                                                       |
| 037 | 880       | Fungi                 | Basidiomycota | Thelephorales     | <i>Tomentella</i>    | 0      | 0      | 0     | 1      | 0      | 0      | 1      | 0      | 1      | 0     | 0      | 1      | 0     | 0      | 0     | 0                | dfmo0690_028, dfmo0690_072, dfmo0690_247, dfmo1059_175                                                                       |
| 038 | 452       | Fungi                 | Ascomycota    |                   |                      | 0      | 0      | 0     | 0      | 0      | 1      | 0      | 0      | 0      | 0     | 0      | 0      | 0     | 0      | 3     | 0                | dfmo0690_172, dfmo0726_084, dfmo0726_087, dfmo0726_093                                                                       |
| 039 | 924       | Fungi                 | Ascomycota    | Dothidiomycetidae | <i>Guignardia</i>    | 0      | 1      | 2     | 0      | 0      | 0      | 0      | 0      | 0      | 0     | 0      | 0      | 0     | 0      | 1     | 0                | dfmo0688_117, dfmo0723_098, dfmo0723_106, dfmo0726_077                                                                       |
| 040 | 751       | Fungi                 | Basidiomycota | Polyporales       | <i>Athelia</i>       | 0      | 0      | 0     | 0      | 0      | 1      | 2      | 0      | 0      | 0     | 0      | 0      | 0     | 0      | 1     | 0                | dfmo0690_159, dfmo0690_194, dfmo0690_217, dfmo0726_110                                                                       |
| 041 | 1172      | Fungi                 | Basidiomycota | Russulales        | <i>Russula</i>       | 0      | 0      | 0     | 0      | 1      | 1      | 0      | 0      | 2      | 0     | 0      | 0      | 0     | 0      | 0     | 0                | dfmo0690_077, dfmo0690_091, dfmo0690_127, dfmo0690_169                                                                       |
| 042 | 959       | Fungi                 | Basidiomycota |                   |                      | 0      | 0      | 5     | 0      | 0      | 0      | 0      | 0      | 0      | 0     | 0      | 0      | 0     | 0      | 0     | 0                | dfmo0723_031, dfmo0723_036, dfmo0723_041, dfmo0723_059, dfmo0723_074                                                         |
| 043 | 305       | Fungi                 | Basidiomycota |                   |                      | 0      | 0      | 0     | 0      | 0      | 0      | 0      | 0      | 0      | 0     | 0      | 0      | 4     | 0      | 0     | 0                | dfmo0725_002, dfmo0725_050, dfmo0725_092, dfmo0725_109                                                                       |

| OTU | Bit Score | Kingdom or Subkingdom | Phylum        | Order or Subclass | Genus             | MH-L-1 | MH-L-2 | P-L-1 | MH-O-1 | MH-O-2 | MH-O-3 | MH-O-4 | MH-O-5 | MH-O-6 | P-O-1 | MH-A-1 | MH-A-2 | P-A-1 | MH-B-1 | P-B-1 | Sequence numbers                                       |
|-----|-----------|-----------------------|---------------|-------------------|-------------------|--------|--------|-------|--------|--------|--------|--------|--------|--------|-------|--------|--------|-------|--------|-------|--------------------------------------------------------|
| 044 | 1061      | Fungi                 |               |                   |                   | 0      | 0      | 0     | 0      | 0      | 0      | 0      | 0      | 0      | 0     | 0      | 0      | 4     | 0      | 0     | dfmo0725_021, dfmo0725_022, dfmo0725_039, dfmo0725_052 |
| 045 | 291       | Fungi                 | Basidiomycota |                   |                   | 0      | 0      | 0     | 0      | 0      | 0      | 0      | 0      | 0      | 0     | 0      | 0      | 1     | 0      | 3     | dfmo0725_107, dfmo0726_004, dfmo0726_015, dfmo0726_021 |
| 046 | 474       | Fungi                 | Ascomycota    | Leotiomycetidae   |                   | 0      | 0      | 0     | 0      | 1      | 0      | 0      | 0      | 0      | 0     | 0      | 0      | 0     | 0      | 3     | dfmo0690_149, dfmo0726_044, dfmo0726_047, dfmo0726_051 |
| 047 | 989       | Fungi                 | Basidiomycota | Agaricales        |                   | 0      | 0      | 0     | 0      | 0      | 1      | 1      | 0      | 0      | 0     | 1      | 1      | 0     | 0      | 0     | dfmo0690_154, dfmo0690_191, dfmo1059_103, dfmo1059_253 |
| 048 | 884       | Fungi                 | Ascomycota    | Dothidiomycetidae | <i>Cenococcum</i> | 0      | 0      | 0     | 0      | 0      | 0      | 3      | 0      | 0      | 0     | 0      | 0      | 1     | 0      | 0     | dfmo0690_196, dfmo0690_211, dfmo0690_246, dfmo0725_079 |
| 049 | 161       | Fungi                 |               |                   |                   | 0      | 0      | 0     | 0      | 0      | 0      | 0      | 0      | 0      | 0     | 0      | 0      | 4     | 0      | 0     | dfmo0725_026, dfmo0725_061, dfmo0725_071, dfmo0725_106 |
| 050 | 333       | Fungi                 | Basidiomycota |                   |                   | 0      | 0      | 0     | 0      | 0      | 0      | 0      | 0      | 0      | 0     | 0      | 0      | 0     | 0      | 4     | dfmo0726_095, dfmo0726_105, dfmo0726_111, dfmo0726_126 |
| 051 | 1057      | Fungi                 | Basidiomycota | Russulales        | <i>Peniophora</i> | 0      | 1      | 0     | 0      | 0      | 0      | 0      | 0      | 0      | 0     | 0      | 0      | 0     | 0      | 3     | dfmo0688_142, dfmo0726_080, dfmo0726_085, dfmo0726_086 |
| 052 | 547       | Fungi                 | Ascomycota    | Leotiomycetidae   |                   | 0      | 0      | 0     | 0      | 0      | 0      | 0      | 0      | 0      | 0     | 0      | 0      | 1     | 3      | 0     | dfmo0725_049, dfmo1060_036, dfmo1060_069, dfmo1060_105 |
| 053 | 585       | Fungi                 | Basidiomycota | Sporidiales       |                   | 0      | 0      | 0     | 0      | 0      | 0      | 0      | 0      | 0      | 0     | 1      | 1      | 1     | 0      | 0     | dfmo0725_075, dfmo1059_050, dfmo1059_240               |
| 054 | 860       | Fungi                 | Basidiomycota | Russulales        |                   | 0      | 0      | 0     | 0      | 0      | 0      | 0      | 0      | 0      | 0     | 1      | 1      | 0     | 1      | 0     | dfmo1059_097, dfmo1059_163, dfmo1060_002               |
| 055 | 274       | Fungi                 | Basidiomycota |                   |                   | 0      | 0      | 0     | 0      | 0      | 0      | 0      | 0      | 0      | 0     | 0      | 0      | 3     | 0      | 0     | dfmo0725_014, dfmo0725_063, dfmo0725_097               |
| 056 | 478       | Fungi                 | Ascomycota    | Leotiomycetidae   |                   | 0      | 2      | 0     | 0      | 0      | 0      | 0      | 0      | 0      | 0     | 0      | 0      | 0     | 0      | 1     | dfmo0688_089, dfmo0688_114, dfmo0726_062               |
| 057 | 1021      | Fungi                 | Ascomycota    | Dothidiomycetidae | <i>Hormonema</i>  | 2      | 1      | 0     | 0      | 0      | 0      | 0      | 0      | 0      | 0     | 0      | 0      | 0     | 0      | 0     | dfmo0688_013, dfmo0688_014, dfmo0688_128               |
| 058 | 664       | Fungi                 | Ascomycota    | Leotiomycetidae   |                   | 3      | 0      | 0     | 0      | 0      | 0      | 0      | 0      | 0      | 0     | 0      | 0      | 0     | 0      | 0     | dfmo0688_009, dfmo0688_010, dfmo0688_017               |
| 059 | 1269      | Fungi                 | Basidiomycota | Cantharellales    | <i>Clavulina</i>  | 0      | 0      | 0     | 0      | 0      | 0      | 0      | 0      | 0      | 0     | 0      | 0      | 3     | 0      | 0     | dfmo0725_006, dfmo0725_070, dfmo0725_091               |
| 060 | 799       | Fungi                 | Ascomycota    | Sordariomycetidae | <i>Glomerella</i> | 0      | 2      | 0     | 0      | 1      | 0      | 0      | 0      | 0      | 0     | 0      | 0      | 0     | 0      | 0     | dfmo0688_095, dfmo0688_121, dfmo0690_147               |
| 061 | 940       | Fungi                 | Basidiomycota | Russulales        | <i>Russula</i>    | 0      | 0      | 0     | 0      | 0      | 0      | 0      | 0      | 0      | 0     | 1      | 1      | 0     | 1      | 0     | dfmo1059_041, dfmo1059_236, dfmo1060_017               |
| 062 | 84        | Metazoa               |               |                   |                   | 0      | 0      | 0     | 0      | 0      | 0      | 0      | 0      | 0      | 0     | 2      | 1      | 0     | 0      | 0     | dfmo1059_099, dfmo1059_115, dfmo1059_203               |
| 063 | 90        | Metazoa               |               |                   |                   | 0      | 0      | 0     | 1      | 0      | 0      | 2      | 0      | 0      | 0     | 0      | 0      | 0     | 0      | 0     | dfmo0690_019, dfmo0690_193, dfmo0690_195               |
| 064 | 1045      | Fungi                 | Basidiomycota | Russulales        |                   | 0      | 0      | 0     | 3      | 0      | 0      | 0      | 0      | 0      | 0     | 0      | 0      | 0     | 0      | 0     | dfmo0690_004, dfmo0690_005, dfmo0690_009               |
| 065 | 309       | Fungi                 | Ascomycota    |                   |                   | 0      | 0      | 0     | 0      | 0      | 0      | 0      | 0      | 0      | 0     | 0      | 1      | 0     | 0      | 2     | dfmo0726_010, dfmo0726_024, dfmo1059_153               |
| 066 | 1051      | Fungi                 | Basidiomycota | Cantharellales    |                   | 0      | 0      | 0     | 0      | 0      | 2      | 0      | 0      | 1      | 0     | 0      | 0      | 0     | 0      | 0     | dfmo0690_087, dfmo0690_155, dfmo0690_163               |
| 067 | 676       | Fungi                 | Ascomycota    | Leotiomycetidae   |                   | 0      | 0      | 0     | 0      | 2      | 0      | 0      | 0      | 0      | 0     | 0      | 1      | 0     | 0      | 0     | dfmo0690_098, dfmo0690_117, dfmo1059_122               |
| 068 | 640       | Fungi                 | Ascomycota    | Leotiomycetidae   |                   | 3      | 0      | 0     | 0      | 0      | 0      | 0      | 0      | 0      | 0     | 0      | 0      | 0     | 0      | 0     | dfmo0688_024, dfmo0688_043, dfmo0688_045               |
| 069 | 535       | Fungi                 | Basidiomycota | Boletales         |                   | 0      | 0      | 0     | 0      | 0      | 0      | 0      | 0      | 0      | 0     | 0      | 0      | 0     | 0      | 3     | dfmo0726_003, dfmo0726_009, dfmo0726_037               |
| 070 | 692       | Fungi                 | Basidiomycota | Thelephorales     |                   | 0      | 1      | 0     | 0      | 2      | 0      | 0      | 0      | 0      | 0     | 0      | 0      | 0     | 0      | 0     | dfmo0688_101, dfmo0690_113, dfmo0690_115               |
| 071 | 767       | Fungi                 | Ascomycota    | Dothidiomycetidae |                   | 2      | 0      | 1     | 0      | 0      | 0      | 0      | 0      | 0      | 0     | 0      | 0      | 0     | 0      | 0     | dfmo0688_025, dfmo0688_032, dfmo0723_064               |
| 072 | 537       | Fungi                 | Basidiomycota |                   |                   | 0      | 0      | 0     | 0      | 0      | 0      | 1      | 0      | 0      | 0     | 0      | 0      | 0     | 0      | 2     | dfmo0690_040, dfmo0726_094, dfmo0726_096               |
| 073 | 1059      | Fungi                 | Basidiomycota | Agaricales        | <i>Amanita</i>    | 0      | 0      | 0     | 0      | 0      | 0      | 0      | 0      | 0      | 0     | 0      | 3      | 0     | 0      | 0     | dfmo1059_131, dfmo1059_166, dfmo1059_198               |

| OTU | Bit Score | Kingdom or Subkingdom | Phylum        | Order or Subclass | Genus                 | MH-L-1 | MH-L-2 | P-L-1 | MH-O-1 | MH-O-2 | MH-O-3 | MH-O-4 | MH-O-5 | MH-O-6 | P-O-1 | MH-A-1 | MH-A-2 | P-A-1 | MH-B-1 | P-B-1 | Sequence numbers                         |
|-----|-----------|-----------------------|---------------|-------------------|-----------------------|--------|--------|-------|--------|--------|--------|--------|--------|--------|-------|--------|--------|-------|--------|-------|------------------------------------------|
| 074 | 315       | Fungi                 | Ascomycota    |                   |                       | 0      | 0      | 0     | 0      | 0      | 0      | 0      | 0      | 0      | 0     | 0      | 0      | 0     | 0      | 0     | dfmo1060_051, dfmo1060_067, dfmo1060_075 |
| 075 | 1128      | Fungi                 | Basidiomycota | Polyporales       | <i>Athelia</i>        | 0      | 1      | 1     | 0      | 0      | 0      | 0      | 0      | 0      | 1     | 0      | 0      | 0     | 0      | 0     | dfmo0688_061, dfmo0724_002, dfmo0723_043 |
| 076 | 90        | Metazoa               |               |                   |                       | 0      | 0      | 0     | 0      | 0      | 0      | 0      | 0      | 0      | 0     | 3      | 0      | 0     | 0      | 0     | dfmo1059_036, dfmo1059_057, dfmo1059_081 |
| 077 | 632       | Fungi                 | Ascomycota    | Dothidomycetidae  |                       | 0      | 0      | 3     | 0      | 0      | 0      | 0      | 0      | 0      | 0     | 0      | 0      | 0     | 0      | 0     | dfmo0723_023, dfmo0723_073, dfmo0723_086 |
| 078 | 369       | Fungi                 | Ascomycota    |                   |                       | 0      | 0      | 0     | 0      | 0      | 0      | 0      | 0      | 0      | 0     | 0      | 3      | 0     | 0      | 0     | dfmo1059_181, dfmo1059_201, dfmo1059_237 |
| 079 | 252       | Fungi                 | Basidiomycota |                   |                       | 0      | 0      | 0     | 0      | 0      | 0      | 1      | 0      | 1      | 0     | 0      | 0      | 0     | 0      | 0     | dfmo0690_076, dfmo0690_206               |
| 080 | 904       | Fungi                 | Ascomycota    | Dothidomycetidae  | <i>Cladosporium</i>   | 0      | 0      | 0     | 0      | 0      | 0      | 0      | 0      | 0      | 0     | 1      | 1      | 0     | 0      | 0     | dfmo1059_108, dfmo1059_204               |
| 081 | 274       | Metazoa               |               |                   |                       | 0      | 0      | 0     | 0      | 1      | 0      | 1      | 0      | 0      | 0     | 0      | 0      | 0     | 0      | 0     | dfmo0690_099, dfmo0690_181               |
| 082 | 1122      | Fungi                 | Basidiomycota | Tremellales       |                       | 0      | 0      | 0     | 1      | 1      | 0      | 0      | 0      | 0      | 0     | 0      | 0      | 0     | 0      | 0     | dfmo0690_015, dfmo0690_100               |
| 083 | 690       | Fungi                 | Ascomycota    | Leotiomycetidae   |                       | 1      | 0      | 0     | 0      | 0      | 1      | 0      | 0      | 0      | 0     | 0      | 0      | 0     | 0      | 0     | dfmo0688_030, dfmo0690_156               |
| 084 | 428       | Fungi                 | Ascomycota    | Sordariomycetidae |                       | 0      | 1      | 0     | 0      | 0      | 0      | 1      | 0      | 0      | 0     | 0      | 0      | 0     | 0      | 0     | dfmo0688_144, dfmo0690_203               |
| 085 | 1019      | Fungi                 | Basidiomycota | Polyporales       | <i>Athelia</i>        | 0      | 0      | 1     | 1      | 0      | 0      | 0      | 0      | 0      | 0     | 0      | 0      | 0     | 0      | 0     | dfmo0690_010, dfmo0723_008               |
| 086 | 938       | Fungi                 | Basidiomycota | Thelephorales     |                       | 0      | 0      | 0     | 0      | 0      | 0      | 0      | 0      | 0      | 0     | 0      | 2      | 0     | 0      | 0     | dfmo1059_222, dfmo1059_247               |
| 087 | 90        | Metazoa               |               |                   |                       | 0      | 0      | 0     | 0      | 0      | 0      | 0      | 0      | 0      | 0     | 0      | 1      | 0     | 1      | 0     | dfmo1059_146, dfmo1060_045               |
| 088 | 446       | Fungi                 | Ascomycota    |                   |                       | 0      | 0      | 0     | 0      | 0      | 0      | 0      | 0      | 0      | 0     | 0      | 0      | 0     | 0      | 2     | dfmo0726_014, dfmo0726_119               |
| 089 | 402       | Fungi                 | Ascomycota    |                   |                       | 0      | 0      | 0     | 0      | 0      | 0      | 0      | 0      | 0      | 0     | 0      | 0      | 0     | 0      | 2     | dfmo0726_023, dfmo0726_130               |
| 090 | 888       | Fungi                 | Ascomycota    |                   |                       | 0      | 1      | 0     | 1      | 0      | 0      | 0      | 0      | 0      | 0     | 0      | 0      | 0     | 0      | 0     | dfmo0688_140, dfmo0690_022               |
| 091 | 932       | Fungi                 | Basidiomycota | Thelephorales     |                       | 0      | 0      | 0     | 1      | 1      | 0      | 0      | 0      | 0      | 0     | 0      | 0      | 0     | 0      | 0     | dfmo0690_030, dfmo0690_118               |
| 092 | 377       | Fungi                 | Basidiomycota | Agaricales        |                       | 0      | 2      | 0     | 0      | 0      | 0      | 0      | 0      | 0      | 0     | 0      | 0      | 0     | 0      | 0     | dfmo0688_115, dfmo0688_160               |
| 093 | 504       | Fungi                 | Ascomycota    |                   |                       | 0      | 0      | 0     | 0      | 0      | 0      | 0      | 0      | 0      | 0     | 0      | 0      | 0     | 0      | 2     | dfmo0726_057, dfmo0726_073               |
| 094 | 948       | Fungi                 | Ascomycota    | Dothidomycetidae  | <i>Hormonema</i>      | 0      | 0      | 2     | 0      | 0      | 0      | 0      | 0      | 0      | 0     | 0      | 0      | 0     | 0      | 0     | dfmo0723_068, dfmo0723_083               |
| 095 | 1168      | Fungi                 | Zygomycota    | Mortierellales    | <i>Mortierella</i>    | 0      | 0      | 0     | 0      | 1      | 0      | 0      | 0      | 0      | 0     | 0      | 1      | 0     | 0      | 0     | dfmo0690_101, dfmo1059_170               |
| 096 | 355       | Fungi                 |               |                   |                       | 0      | 0      | 0     | 0      | 0      | 0      | 0      | 0      | 0      | 0     | 0      | 0      | 0     | 0      | 2     | dfmo0726_112, dfmo0726_121               |
| 097 | 359       | Fungi                 | Ascomycota    |                   |                       | 0      | 2      | 0     | 0      | 0      | 0      | 0      | 0      | 0      | 0     | 0      | 0      | 0     | 0      | 0     | dfmo0688_079, dfmo0688_123               |
| 098 | 1122      | Fungi                 | Basidiomycota | Phallales         | <i>Ramariopsis</i>    | 0      | 0      | 0     | 0      | 0      | 0      | 0      | 0      | 0      | 0     | 0      | 0      | 2     | 0      | 0     | dfmo0725_028, dfmo0725_029               |
| 099 | 480       | Fungi                 | Ascomycota    | Pezizomycetidae   |                       | 2      | 0      | 0     | 0      | 0      | 0      | 0      | 0      | 0      | 0     | 0      | 0      | 0     | 0      | 0     | dfmo0688_001, dfmo0688_011               |
| 100 | 789       | Fungi                 | Ascomycota    | Leotiomycetidae   |                       | 0      | 0      | 0     | 0      | 0      | 0      | 0      | 0      | 0      | 3     | 0      | 0      | 0     | 0      | 0     | dfmo0724_006, dfmo0724_008, dfmo0724_027 |
| 101 | 256       | Alveolata             |               |                   |                       | 0      | 0      | 0     | 0      | 0      | 0      | 0      | 0      | 0      | 0     | 0      | 0      | 0     | 0      | 2     | dfmo0726_066, dfmo0726_082               |
| 102 | 603       | Fungi                 | Ascomycota    |                   |                       | 0      | 0      | 0     | 0      | 2      | 0      | 0      | 0      | 0      | 0     | 0      | 0      | 0     | 0      | 0     | dfmo0690_138, dfmo0690_146               |
| 103 | 149       | Metazoa               |               |                   |                       | 0      | 0      | 0     | 0      | 0      | 0      | 0      | 0      | 0      | 1     | 0      | 0      | 2     | 0      | 0     | dfmo0724_055, dfmo0725_035, dfmo0725_102 |
| 104 | 884       | Fungi                 | Basidiomycota | Polyporales       | <i>Hydnocristella</i> | 0      | 0      | 0     | 0      | 0      | 0      | 0      | 0      | 0      | 0     | 0      | 0      | 0     | 0      | 2     | dfmo0726_046, dfmo0726_075               |
| 105 | 90        | Metazoa               |               |                   |                       | 0      | 0      | 0     | 0      | 0      | 0      | 0      | 0      | 0      | 0     | 2      | 0      | 0     | 0      | 0     | dfmo1059_012, dfmo1059_080               |

| OTU | Bit Score | Kingdom or Subkingdom | Phylum        | Order or Subclass     | Genus                 | MH-L-1 | MH-L-2 | P-L-1 | MH-O-1 | MH-O-2 | MH-O-3 | MH-O-4 | MH-O-5 | MH-O-6 | P-O-1 | MH-A-1 | MH-A-2 | P-A-1 | MH-B-1 | P-B-1 | Sequence numbers           |
|-----|-----------|-----------------------|---------------|-----------------------|-----------------------|--------|--------|-------|--------|--------|--------|--------|--------|--------|-------|--------|--------|-------|--------|-------|----------------------------|
| 106 | 1114      | Fungi                 | Basidiomycota |                       |                       | 0      | 0      | 0     | 0      | 0      | 0      | 0      | 0      | 0      | 0     | 0      | 0      | 2     | 0      | 0     | dfmo0725_043, dfmo0725_105 |
| 107 | 1158      | Fungi                 | Basidiomycota |                       |                       | 0      | 0      | 0     | 0      | 0      | 0      | 2      | 0      | 0      | 0     | 0      | 0      | 0     | 0      | 0     | dfmo0690_209, dfmo0690_245 |
| 108 | 492       | Fungi                 | Basidiomycota | Thelephorales         |                       | 0      | 0      | 0     | 0      | 0      | 0      | 0      | 0      | 0      | 2     | 0      | 0      | 0     | 0      | 0     | dfmo0724_052, dfmo0724_060 |
| 109 | 345       | Fungi                 | Ascomycota    |                       |                       | 0      | 0      | 0     | 0      | 0      | 0      | 0      | 0      | 0      | 0     | 0      | 2      | 0     | 0      | 0     | dfmo1059_183, dfmo1059_214 |
| 110 | 274       | Fungi                 | Basidiomycota |                       |                       | 0      | 0      | 0     | 0      | 0      | 0      | 0      | 0      | 0      | 0     | 0      | 1      | 0     | 1      | 0     | dfmo1059_134, dfmo1060_042 |
| 111 | 327       | Fungi                 | Ascomycota    |                       |                       | 0      | 0      | 0     | 0      | 0      | 0      | 0      | 0      | 0      | 0     | 0      | 0      | 0     | 2      | 0     | dfmo1060_072, dfmo1060_082 |
| 112 | 886       | Fungi                 | Ascomycota    | Leotiomycetidae       |                       | 0      | 1      | 1     | 0      | 0      | 0      | 0      | 0      | 0      | 0     | 0      | 0      | 0     | 0      | 0     | dfmo0688_106, dfmo0723_062 |
| 113 | 1011      | Fungi                 | Basidiomycota | Russulales            | <i>Russula</i>        | 0      | 0      | 0     | 0      | 1      | 0      | 0      | 0      | 1      | 0     | 0      | 0      | 0     | 0      | 0     | dfmo0690_096, dfmo0690_144 |
| 114 | 628       | Fungi                 | Ascomycota    | Leotiomycetidae       |                       | 2      | 0      | 0     | 0      | 0      | 0      | 0      | 0      | 0      | 0     | 0      | 0      | 0     | 0      | 0     | dfmo0688_050, dfmo0688_056 |
| 115 | 90        | Metazoa               |               |                       |                       | 0      | 0      | 0     | 0      | 0      | 0      | 0      | 0      | 0      | 0     | 2      | 0      | 0     | 0      | 0     | dfmo1059_098, dfmo1059_102 |
| 116 | 315       | Fungi                 | Ascomycota    |                       |                       | 0      | 0      | 0     | 0      | 0      | 0      | 0      | 0      | 0      | 1     | 1      | 0      | 0     | 0      | 0     | dfmo0724_077, dfmo1059_082 |
| 117 | 819       | Fungi                 | Ascomycota    | Chaetothyriomycetidae | <i>Ramichloridium</i> | 0      | 2      | 0     | 0      | 0      | 0      | 0      | 0      | 0      | 0     | 0      | 0      | 0     | 0      | 0     | dfmo0688_065, dfmo0688_068 |
| 118 | 910       | Fungi                 | Basidiomycota | Agaricales            | <i>Melanophyllum</i>  | 0      | 0      | 0     | 0      | 0      | 0      | 1      | 0      | 1      | 0     | 0      | 0      | 0     | 0      | 0     | dfmo0690_081, dfmo0690_231 |
| 119 | 1193      | Fungi                 | Basidiomycota | Russulales            | <i>Russula</i>        | 0      | 0      | 0     | 0      | 0      | 0      | 0      | 0      | 0      | 0     | 0      | 0      | 2     | 0      | 0     | dfmo0725_036, dfmo0725_047 |
| 120 | 418       | Fungi                 | Zygomycota    |                       |                       | 0      | 0      | 0     | 0      | 0      | 0      | 0      | 0      | 0      | 0     | 0      | 0      | 2     | 0      | 0     | dfmo0725_048, dfmo0725_094 |
| 121 | 1168      | Fungi                 | Ascomycota    | Pezizomycetidae       | <i>Peziza</i>         | 0      | 0      | 0     | 0      | 0      | 0      | 1      | 0      | 0      | 0     | 0      | 1      | 0     | 0      | 0     | dfmo0690_210, dfmo1059_145 |
| 122 | 920       | Fungi                 | Ascomycota    | Leotiomycetidae       |                       | 0      | 0      | 0     | 0      | 0      | 0      | 0      | 0      | 0      | 0     | 0      | 0      | 2     | 0      | 0     | dfmo0725_023, dfmo0725_044 |
| 123 | 323       | Fungi                 | Ascomycota    |                       |                       | 0      | 0      | 0     | 0      | 0      | 0      | 0      | 0      | 0      | 0     | 0      | 1      | 1     | 0      | 0     | dfmo0725_054, dfmo1059_185 |
| 124 | 720       | Fungi                 | Ascomycota    | Dothidiomycetidae     |                       | 0      | 0      | 0     | 0      | 0      | 1      | 0      | 1      | 0      | 0     | 0      | 0      | 0     | 0      | 0     | dfmo0690_048, dfmo0690_164 |
| 125 | 367       | Fungi                 | Ascomycota    |                       |                       | 0      | 0      | 0     | 0      | 0      | 0      | 2      | 0      | 0      | 0     | 0      | 0      | 0     | 0      | 0     | dfmo0690_185, dfmo0690_238 |
| 126 | 1211      | Fungi                 | Basidiomycota | Phallales             | <i>Ramaria</i>        | 0      | 0      | 0     | 1      | 0      | 0      | 1      | 0      | 0      | 0     | 0      | 0      | 0     | 0      | 0     | dfmo0690_002, dfmo0690_220 |
| 127 | 90        | Metazoa               |               |                       |                       | 0      | 0      | 0     | 0      | 0      | 0      | 0      | 0      | 0      | 0     | 2      | 0      | 0     | 0      | 0     | dfmo1059_027, dfmo1059_058 |
| 128 | 504       | Fungi                 | Ascomycota    |                       |                       | 0      | 1      | 0     | 0      | 0      | 0      | 1      | 0      | 0      | 0     | 0      | 0      | 0     | 0      | 0     | dfmo0688_143, dfmo0690_233 |
| 129 | 1336      | Fungi                 | Basidiomycota | Russulales            | <i>Lactarius</i>      | 0      | 0      | 0     | 0      | 0      | 0      | 0      | 0      | 0      | 0     | 0      | 0      | 2     | 0      | 0     | dfmo0725_083, dfmo0725_086 |
| 130 | 1152      | Fungi                 | Basidiomycota | Russulales            | <i>Russula</i>        | 0      | 0      | 0     | 0      | 0      | 0      | 0      | 0      | 0      | 0     | 0      | 0      | 2     | 0      | 0     | dfmo0725_068, dfmo0725_073 |
| 131 | 468       | Fungi                 | Ascomycota    | Dothidiomycetidae     |                       | 0      | 1      | 0     | 0      | 1      | 0      | 0      | 0      | 0      | 0     | 0      | 0      | 0     | 0      | 0     | dfmo0688_091, dfmo0690_121 |
| 132 | 325       | Fungi                 | Ascomycota    |                       |                       | 0      | 0      | 0     | 0      | 0      | 0      | 0      | 0      | 0      | 0     | 1      | 1      | 0     | 0      | 0     | dfmo1059_094, dfmo1059_192 |
| 133 | 371       | Fungi                 |               |                       |                       | 0      | 0      | 0     | 0      | 0      | 0      | 0      | 0      | 0      | 0     | 0      | 0      | 0     | 2      | 0     | dfmo0726_098, dfmo0726_109 |
| 134 | 422       | Fungi                 | Ascomycota    | Sordariomycetidae     |                       | 0      | 0      | 0     | 0      | 0      | 0      | 0      | 2      | 0      | 0     | 0      | 0      | 0     | 0      | 0     | dfmo0690_036, dfmo0690_047 |
| 135 | 303       | Fungi                 | Basidiomycota |                       |                       | 0      | 0      | 0     | 0      | 0      | 0      | 0      | 0      | 0      | 0     | 0      | 0      | 2     | 0      | 0     | dfmo0725_008, dfmo0725_030 |
| 136 | 684       | Fungi                 | Ascomycota    | Dothidiomycetidae     |                       | 0      | 1      | 1     | 0      | 0      | 0      | 0      | 0      | 0      | 0     | 0      | 0      | 0     | 0      | 0     | dfmo0688_129, dfmo0723_014 |

| OTU | Bit Score | Kingdom or Subkingdom | Phylum        | Order or Subclass  | Genus            | MH-L-1 | MH-L-2 | P-L-1 | MH-O-1 | MH-O-2 | MH-O-3 | MH-O-4 | MH-O-5 | MH-O-6 | P-O-1 | MH-A-1 | MH-A-2 | P-A-1 | MH-B-1 | P-B-1 | Sequence numbers                         |
|-----|-----------|-----------------------|---------------|--------------------|------------------|--------|--------|-------|--------|--------|--------|--------|--------|--------|-------|--------|--------|-------|--------|-------|------------------------------------------|
| 137 | 1191      | Fungi                 | Basidiomycota | Russulales         | <i>Russula</i>   | 0      | 0      | 0     | 0      | 0      | 0      | 0      | 0      | 0      | 0     | 1      | 0      | 0     | 1      | 0     | dfmo1059_033, dfmo1060_025               |
| 138 | 343       | Fungi                 | Ascomycota    |                    |                  | 0      | 0      | 2     | 0      | 0      | 0      | 0      | 0      | 0      | 0     | 0      | 0      | 0     | 0      | 0     | dfmo0723_020, dfmo0723_080               |
| 139 | 90        | Metazoa               |               |                    |                  | 0      | 0      | 0     | 0      | 0      | 0      | 0      | 0      | 0      | 0     | 0      | 0      | 0     | 2      | 0     | dfmo1060_064, dfmo1060_073               |
| 140 | 90        | Metazoa               |               |                    |                  | 0      | 0      | 0     | 0      | 0      | 0      | 0      | 0      | 0      | 0     | 2      | 0      | 0     | 0      | 0     | dfmo1059_029, dfmo1059_052               |
| 141 | 664       | Fungi                 | Basidiomycota | Ceratobasidiales   |                  | 0      | 0      | 2     | 0      | 0      | 0      | 0      | 0      | 0      | 0     | 0      | 0      | 0     | 0      | 0     | dfmo0723_004, dfmo0723_005               |
| 142 | 478       | Fungi                 | Basidiomycota | Agaricales         |                  | 0      | 0      | 2     | 0      | 0      | 0      | 0      | 0      | 0      | 0     | 0      | 0      | 0     | 0      | 0     | dfmo0723_007, dfmo0723_092               |
| 143 | 430       | Fungi                 | Basidiomycota | Phallales          |                  | 0      | 0      | 1     | 0      | 0      | 0      | 0      | 0      | 0      | 0     | 1      | 0      | 0     | 0      | 0     | dfmo0723_017, dfmo0724_070               |
| 144 | 1100      | Fungi                 | Basidiomycota | Russulales         | <i>Piloderma</i> | 0      | 0      | 1     | 0      | 0      | 0      | 0      | 0      | 0      | 2     | 0      | 0      | 0     | 0      | 0     | dfmo0723_077, dfmo0724_021, dfmo0724_072 |
| 145 | 583       | Fungi                 | Ascomycota    | Leotio-mycetidae   |                  | 0      | 0      | 0     | 0      | 0      | 0      | 0      | 0      | 0      | 3     | 0      | 0      | 0     | 0      | 0     | dfmo0724_015, dfmo0724_028, dfmo0724_089 |
| 146 | 180       | Fungi                 | Basidiomycota |                    |                  | 0      | 0      | 0     | 0      | 0      | 0      | 0      | 0      | 0      | 2     | 0      | 0      | 0     | 0      | 0     | dfmo0724_016, dfmo0724_023               |
| 147 | 1078      | Fungi                 | Basidiomycota | Thelephorales      |                  | 0      | 0      | 0     | 0      | 0      | 0      | 0      | 0      | 0      | 1     | 0      | 0      | 1     | 0      | 0     | dfmo0724_018, dfmo0725_012               |
| 148 | 448       | Fungi                 | Basidiomycota | Agaricales         |                  | 0      | 0      | 0     | 0      | 0      | 0      | 0      | 0      | 0      | 2     | 0      | 0      | 0     | 0      | 0     | dfmo0724_020, dfmo0724_029               |
| 149 | 315       | Fungi                 | Basidiomycota |                    |                  | 0      | 0      | 0     | 0      | 0      | 0      | 0      | 0      | 0      | 2     | 0      | 0      | 0     | 0      | 0     | dfmo0724_025, dfmo0724_065               |
| 150 | 291       | Fungi                 | Basidiomycota |                    |                  | 0      | 0      | 0     | 0      | 0      | 0      | 0      | 0      | 0      | 1     | 0      | 0      | 1     | 0      | 0     | dfmo0724_026, dfmo0725_011               |
| 151 | 331       | Fungi                 | Basidiomycota |                    |                  | 0      | 0      | 0     | 0      | 0      | 0      | 0      | 0      | 0      | 3     | 0      | 0      | 0     | 0      | 0     | dfmo0724_037, dfmo0724_044, dfmo0724_076 |
| 152 | 1080      | Fungi                 | Basidiomycota | Tremellales        |                  | 0      | 0      | 0     | 0      | 0      | 0      | 1      | 0      | 0      | 1     | 0      | 0      | 0     | 0      | 0     | dfmo0724_042, dfmo0690_171               |
| 153 | 361       | Fungi                 |               |                    |                  | 0      | 0      | 0     | 0      | 0      | 0      | 0      | 0      | 0      | 1     | 0      | 0      | 1     | 0      | 0     | dfmo0724_024, dfmo0725_032               |
| 154 | 474       | Fungi                 | Ascomycota    |                    |                  | 1      | 0      | 0     | 0      | 0      | 0      | 0      | 0      | 0      | 0     | 0      | 0      | 0     | 0      | 0     | dfmo0688_035                             |
| 155 | 678       | Fungi                 | Ascomycota    | Leotio-mycetidae   |                  | 1      | 0      | 0     | 0      | 0      | 0      | 0      | 0      | 0      | 0     | 0      | 0      | 0     | 0      | 0     | dfmo0688_036                             |
| 156 | 361       | Fungi                 | Basidiomycota | Agaricales         |                  | 1      | 0      | 0     | 0      | 0      | 0      | 0      | 0      | 0      | 0     | 0      | 0      | 0     | 0      | 0     | dfmo0688_048                             |
| 157 | 601       | Fungi                 | Ascomycota    | Leotio-mycetidae   |                  | 1      | 0      | 0     | 0      | 0      | 0      | 0      | 0      | 0      | 0     | 0      | 0      | 0     | 0      | 0     | dfmo0688_052                             |
| 158 | 337       | Fungi                 | Basidiomycota |                    |                  | 0      | 1      | 0     | 0      | 0      | 0      | 0      | 0      | 0      | 0     | 0      | 0      | 0     | 0      | 0     | dfmo0688_057                             |
| 159 | 803       | Fungi                 | Ascomycota    | Sordario-mycetidae |                  | 0      | 1      | 0     | 0      | 0      | 0      | 0      | 0      | 0      | 0     | 0      | 0      | 0     | 0      | 0     | dfmo0688_059                             |
| 160 | 488       | Fungi                 | Ascomycota    | Dothidio-mycetidae |                  | 0      | 1      | 0     | 0      | 0      | 0      | 0      | 0      | 0      | 0     | 0      | 0      | 0     | 0      | 0     | dfmo0688_060                             |
| 161 | 577       | Fungi                 | Ascomycota    | Leotio-mycetidae   |                  | 0      | 1      | 0     | 0      | 0      | 0      | 0      | 0      | 0      | 0     | 0      | 0      | 0     | 0      | 0     | dfmo0688_063                             |
| 162 | 343       | Fungi                 | Basidiomycota |                    |                  | 0      | 1      | 0     | 0      | 0      | 0      | 0      | 0      | 0      | 0     | 0      | 0      | 0     | 0      | 0     | dfmo0688_071                             |
| 163 | 747       | Fungi                 | Ascomycota    | Dothidio-mycetidae |                  | 0      | 1      | 0     | 0      | 0      | 0      | 0      | 0      | 0      | 0     | 0      | 0      | 0     | 0      | 0     | dfmo0688_072                             |
| 164 | 365       | Fungi                 | Basidiomycota |                    |                  | 0      | 1      | 0     | 0      | 0      | 0      | 0      | 0      | 0      | 0     | 0      | 0      | 0     | 0      | 0     | dfmo0688_076                             |
| 165 | 335       | Fungi                 | Ascomycota    |                    |                  | 0      | 1      | 0     | 0      | 0      | 0      | 0      | 0      | 0      | 0     | 0      | 0      | 0     | 0      | 0     | dfmo0688_077                             |
| 166 | 531       | Fungi                 | Basidiomycota | Tremellales        |                  | 0      | 1      | 0     | 0      | 0      | 0      | 0      | 0      | 0      | 0     | 0      | 0      | 0     | 0      | 0     | dfmo0688_083                             |
| 167 | 628       | Fungi                 | Ascomycota    |                    |                  | 0      | 1      | 0     | 0      | 0      | 0      | 0      | 0      | 0      | 0     | 0      | 0      | 0     | 0      | 0     | dfmo0688_084                             |
| 168 | 381       | Fungi                 | Basidiomycota |                    |                  | 0      | 1      | 0     | 0      | 0      | 0      | 0      | 0      | 0      | 0     | 0      | 0      | 0     | 0      | 0     | dfmo0688_085                             |









| OTU | Bit Score | Kingdom or Subkingdom | Phylum        | Order or Subclass | Genus               | MH-L-1 | MH-L-2 | P-L-1 | MH-O-1 | MH-O-2 | MH-O-3 | MH-O-4 | MH-O-5 | MH-O-6 | P-O-1 | MH-A-1 | MH-A-2 | P-A-1 | MH-B-1 | P-B-1 | Sequence numbers |
|-----|-----------|-----------------------|---------------|-------------------|---------------------|--------|--------|-------|--------|--------|--------|--------|--------|--------|-------|--------|--------|-------|--------|-------|------------------|
| 294 | 323       | Fungi                 | Basidiomycota |                   |                     | 0      | 0      | 1     | 0      | 0      | 0      | 0      | 0      | 0      | 0     | 0      | 0      | 0     | 0      | 0     | dfmo0723_079     |
| 295 | 581       | Fungi                 | Basidiomycota | Tremellales       |                     | 0      | 0      | 1     | 0      | 0      | 0      | 0      | 0      | 0      | 0     | 0      | 0      | 0     | 0      | 0     | dfmo0723_082     |
| 296 | 906       | Fungi                 | Basidiomycota | Tremellales       | <i>Cryptococcus</i> | 0      | 0      | 1     | 0      | 0      | 0      | 0      | 0      | 0      | 0     | 0      | 0      | 0     | 0      | 0     | dfmo0723_084     |
| 297 | 492       | Fungi                 | Basidiomycota | Russulales        |                     | 0      | 0      | 1     | 0      | 0      | 0      | 0      | 0      | 0      | 0     | 0      | 0      | 0     | 0      | 0     | dfmo0723_085     |
| 298 | 541       | Fungi                 | Basidiomycota |                   |                     | 0      | 0      | 1     | 0      | 0      | 0      | 0      | 0      | 0      | 0     | 0      | 0      | 0     | 0      | 0     | dfmo0723_093     |
| 299 | 339       | Fungi                 | Ascomycota    |                   |                     | 0      | 0      | 1     | 0      | 0      | 0      | 0      | 0      | 0      | 0     | 0      | 0      | 0     | 0      | 0     | dfmo0723_094     |
| 300 | 412       | Fungi                 | Ascomycota    |                   |                     | 0      | 0      | 1     | 0      | 0      | 0      | 0      | 0      | 0      | 0     | 0      | 0      | 0     | 0      | 0     | dfmo0723_095     |
| 301 | 886       | Fungi                 | Ascomycota    | Leotiomycetidae   | <i>Pycnopeziza</i>  | 0      | 0      | 1     | 0      | 0      | 0      | 0      | 0      | 0      | 0     | 0      | 0      | 0     | 0      | 0     | dfmo0723_099     |
| 302 | 769       | Fungi                 | Basidiomycota | Agaricales        | <i>Mycena</i>       | 0      | 0      | 1     | 0      | 0      | 0      | 0      | 0      | 0      | 0     | 0      | 0      | 0     | 0      | 0     | dfmo0723_102     |
| 303 | 464       | Fungi                 | Ascomycota    | Leotiomycetidae   |                     | 0      | 0      | 1     | 0      | 0      | 0      | 0      | 0      | 0      | 0     | 0      | 0      | 0     | 0      | 0     | dfmo0723_104     |
| 304 | 743       | Fungi                 | Ascomycota    | Leotiomycetidae   |                     | 0      | 0      | 1     | 0      | 0      | 0      | 0      | 0      | 0      | 0     | 0      | 0      | 0     | 0      | 0     | dfmo0723_109     |
| 305 | 287       | Fungi                 | Basidiomycota |                   |                     | 0      | 0      | 0     | 0      | 0      | 0      | 0      | 0      | 0      | 1     | 0      | 0      | 0     | 0      | 0     | dfmo0724_005     |
| 306 | 1112      | Fungi                 | Basidiomycota | Phallales         | <i>Ramaria</i>      | 0      | 0      | 0     | 0      | 0      | 0      | 0      | 0      | 0      | 1     | 0      | 0      | 0     | 0      | 0     | dfmo0724_009     |
| 307 | 381       | Fungi                 | Basidiomycota | Agaricales        |                     | 0      | 0      | 0     | 0      | 0      | 0      | 0      | 0      | 0      | 1     | 0      | 0      | 0     | 0      | 0     | dfmo0724_011     |
| 308 | 355       | Fungi                 | Ascomycota    |                   |                     | 0      | 0      | 0     | 0      | 0      | 0      | 0      | 0      | 0      | 1     | 0      | 0      | 0     | 0      | 0     | dfmo0724_012     |
| 309 | 1144      | Fungi                 | Basidiomycota | Russulales        | <i>Russula</i>      | 0      | 0      | 0     | 0      | 0      | 0      | 0      | 0      | 0      | 1     | 0      | 0      | 0     | 0      | 0     | dfmo0724_013     |
| 310 | 761       | Fungi                 | Basidiomycota | Russulales        |                     | 0      | 0      | 0     | 0      | 0      | 0      | 0      | 0      | 0      | 1     | 0      | 0      | 0     | 0      | 0     | dfmo0724_017     |
| 311 | 335       | Fungi                 | Ascomycota    |                   |                     | 0      | 0      | 0     | 0      | 0      | 0      | 0      | 0      | 0      | 1     | 0      | 0      | 0     | 0      | 0     | dfmo0724_030     |
| 312 | 174       | Alveolata             |               |                   |                     | 0      | 0      | 0     | 0      | 0      | 0      | 0      | 0      | 0      | 1     | 0      | 0      | 0     | 0      | 0     | dfmo0724_031     |
| 313 | 896       | Fungi                 | Zygomycota    | Mucorales         | <i>Umbelopsis</i>   | 0      | 0      | 0     | 0      | 0      | 0      | 0      | 0      | 0      | 1     | 0      | 0      | 0     | 0      | 0     | dfmo0724_038     |
| 314 | 62        | Metazoa               |               |                   |                     | 0      | 0      | 0     | 0      | 0      | 0      | 0      | 0      | 0      | 1     | 0      | 0      | 0     | 0      | 0     | dfmo0724_039     |
| 315 | 303       | Fungi                 | Basidiomycota |                   |                     | 0      | 0      | 0     | 0      | 0      | 0      | 0      | 0      | 0      | 1     | 0      | 0      | 0     | 0      | 0     | dfmo0724_040     |
| 316 | 295       | Metazoa               |               |                   |                     | 0      | 0      | 0     | 0      | 0      | 0      | 0      | 0      | 0      | 1     | 0      | 0      | 0     | 0      | 0     | dfmo0724_045     |
| 317 | 456       | Fungi                 | Ascomycota    | Pezizomycetidae   |                     | 0      | 0      | 0     | 0      | 0      | 0      | 0      | 0      | 0      | 1     | 0      | 0      | 0     | 0      | 0     | dfmo0724_046     |
| 318 | 505       | Fungi                 | Basidiomycota | Cantharellales    |                     | 0      | 0      | 0     | 0      | 0      | 0      | 0      | 0      | 0      | 1     | 0      | 0      | 0     | 0      | 0     | dfmo0724_047     |
| 319 | 924       | Fungi                 | Ascomycota    | Eurotiomycetidae  | <i>Geomyces</i>     | 0      | 0      | 0     | 0      | 0      | 0      | 0      | 0      | 0      | 1     | 0      | 0      | 0     | 0      | 0     | dfmo0724_051     |
| 320 | 293       | Fungi                 | Basidiomycota |                   |                     | 0      | 0      | 0     | 0      | 0      | 0      | 0      | 0      | 0      | 1     | 0      | 0      | 0     | 0      | 0     | dfmo0724_061     |
| 321 | 291       | Fungi                 | Ascomycota    |                   |                     | 0      | 0      | 0     | 0      | 0      | 0      | 0      | 0      | 0      | 1     | 0      | 0      | 0     | 0      | 0     | dfmo0724_067     |
| 322 | 200       | Fungi                 |               |                   |                     | 0      | 0      | 0     | 0      | 0      | 0      | 0      | 0      | 0      | 1     | 0      | 0      | 0     | 0      | 0     | dfmo0724_069     |
| 323 | 726       | Fungi                 | Ascomycota    | Leotiomycetidae   |                     | 0      | 0      | 0     | 0      | 0      | 0      | 0      | 0      | 0      | 1     | 0      | 0      | 0     | 0      | 0     | dfmo0724_071     |
| 324 | 323       | Fungi                 | Basidiomycota |                   |                     | 0      | 0      | 0     | 0      | 0      | 0      | 0      | 0      | 0      | 1     | 0      | 0      | 0     | 0      | 0     | dfmo0724_078     |
| 325 | 527       | Fungi                 | Basidiomycota | Thelephorales     |                     | 0      | 0      | 0     | 0      | 0      | 0      | 0      | 0      | 0      | 1     | 0      | 0      | 0     | 0      | 0     | dfmo0724_084     |

| OTU | Bit Score | Kingdom or Subkingdom | Phylum        | Order or Subclass | Genus                   | MH-L-1 | MH-L-2 | P-L-1 | MH-O-1 | MH-O-2 | MH-O-3 | MH-O-4 | MH-O-5 | MH-O-6 | P-O-1 | MH-A-1 | MH-A-2 | P-A-1 | MH-B-1 | P-B-1 | Sequence numbers |
|-----|-----------|-----------------------|---------------|-------------------|-------------------------|--------|--------|-------|--------|--------|--------|--------|--------|--------|-------|--------|--------|-------|--------|-------|------------------|
| 326 | 307       | Fungi                 | Basidiomycota |                   |                         | 0      | 0      | 0     | 0      | 0      | 0      | 0      | 0      | 0      | 1     | 0      | 0      | 0     | 0      | 0     | dfmo0724_085     |
| 327 | 62        | Metazoa               |               |                   |                         | 0      | 0      | 0     | 0      | 0      | 0      | 0      | 0      | 0      | 1     | 0      | 0      | 0     | 0      | 0     | dfmo0724_086     |
| 328 | 1241      | Fungi                 | Basidiomycota | Russulales        | <i>Russula</i>          | 0      | 0      | 0     | 0      | 0      | 0      | 0      | 0      | 0      | 1     | 0      | 0      | 0     | 0      | 0     | dfmo0724_088     |
| 329 | 922       | Fungi                 | Basidiomycota | Trichosporonales  | <i>Trichosporon</i>     | 0      | 0      | 0     | 0      | 0      | 0      | 0      | 0      | 0      | 1     | 0      | 0      | 0     | 0      | 0     | dfmo0724_091     |
| 330 | 942       | Fungi                 | Ascomycota    | Leotiomycetidae   | <i>Cryptosporiopsis</i> | 0      | 0      | 0     | 0      | 0      | 0      | 0      | 0      | 0      | 0     | 0      | 0      | 1     | 0      | 0     | dfmo0725_007     |
| 331 | 1108      | Fungi                 | Basidiomycota | Thelephorales     | <i>Tomentella</i>       | 0      | 0      | 0     | 0      | 0      | 0      | 0      | 0      | 0      | 0     | 0      | 0      | 1     | 0      | 0     | dfmo0725_010     |
| 332 | 674       | Fungi                 | Ascomycota    | Leotiomycetidae   |                         | 0      | 0      | 0     | 0      | 0      | 0      | 0      | 0      | 0      | 0     | 0      | 0      | 1     | 0      | 0     | dfmo0725_013     |
| 333 | 660       | Fungi                 | Basidiomycota |                   |                         | 0      | 0      | 0     | 0      | 0      | 0      | 0      | 0      | 0      | 0     | 0      | 0      | 1     | 0      | 0     | dfmo0725_017     |
| 334 | 309       | Fungi                 | Ascomycota    |                   |                         | 0      | 0      | 0     | 0      | 0      | 0      | 0      | 0      | 0      | 0     | 0      | 0      | 1     | 0      | 0     | dfmo0725_018     |
| 335 | 1217      | Fungi                 | Basidiomycota |                   |                         | 0      | 0      | 0     | 0      | 0      | 0      | 0      | 0      | 0      | 0     | 0      | 0      | 1     | 0      | 0     | dfmo0725_019     |
| 336 | 289       | Fungi                 |               |                   |                         | 0      | 0      | 0     | 0      | 0      | 0      | 0      | 0      | 0      | 0     | 0      | 0      | 1     | 0      | 0     | dfmo0725_024     |
| 337 | 311       | Fungi                 | Ascomycota    |                   |                         | 0      | 0      | 0     | 0      | 0      | 0      | 0      | 0      | 0      | 0     | 0      | 0      | 1     | 0      | 0     | dfmo0725_041     |
| 338 | 412       | Fungi                 | Glomeromycota |                   |                         | 0      | 0      | 0     | 0      | 0      | 0      | 0      | 0      | 0      | 0     | 0      | 0      | 1     | 0      | 0     | dfmo0725_042     |
| 339 | 90        | Metazoa               |               |                   |                         | 0      | 0      | 0     | 0      | 0      | 0      | 0      | 0      | 0      | 0     | 0      | 0      | 1     | 0      | 0     | dfmo0725_045     |
| 340 | 232       | Fungi                 | Basidiomycota |                   |                         | 0      | 0      | 0     | 0      | 0      | 0      | 0      | 0      | 0      | 0     | 0      | 0      | 1     | 0      | 0     | dfmo0725_046     |
| 341 | 276       | Fungi                 | Ascomycota    |                   |                         | 0      | 0      | 0     | 0      | 0      | 0      | 0      | 0      | 0      | 0     | 0      | 0      | 1     | 0      | 0     | dfmo0725_053     |
| 342 | 333       | Fungi                 | Basidiomycota |                   |                         | 0      | 0      | 0     | 0      | 0      | 0      | 0      | 0      | 0      | 0     | 0      | 0      | 1     | 0      | 0     | dfmo0725_055     |
| 343 | 323       | Fungi                 | Basidiomycota |                   |                         | 0      | 0      | 0     | 0      | 0      | 0      | 0      | 0      | 0      | 0     | 0      | 0      | 1     | 0      | 0     | dfmo0725_059     |
| 344 | 311       | Fungi                 | Basidiomycota |                   |                         | 0      | 0      | 0     | 0      | 0      | 0      | 0      | 0      | 0      | 0     | 0      | 0      | 1     | 0      | 0     | dfmo0725_065     |
| 345 | 343       | Fungi                 |               |                   |                         | 0      | 0      | 0     | 0      | 0      | 0      | 0      | 0      | 0      | 0     | 0      | 0      | 1     | 0      | 0     | dfmo0725_072     |
| 346 | 936       | Fungi                 | Basidiomycota | Trichosporonales  | <i>Trichosporon</i>     | 0      | 0      | 0     | 0      | 0      | 0      | 0      | 0      | 0      | 0     | 0      | 0      | 1     | 0      | 0     | dfmo0725_074     |
| 347 | 371       | Fungi                 | Ascomycota    |                   |                         | 0      | 0      | 0     | 0      | 0      | 0      | 0      | 0      | 0      | 0     | 0      | 0      | 1     | 0      | 0     | dfmo0725_081     |
| 348 | 297       | Fungi                 | Basidiomycota |                   |                         | 0      | 0      | 0     | 0      | 0      | 0      | 0      | 0      | 0      | 0     | 0      | 0      | 1     | 0      | 0     | dfmo0725_082     |
| 349 | 1156      | Fungi                 | Basidiomycota | Russulales        | <i>Lactarius</i>        | 0      | 0      | 0     | 0      | 0      | 0      | 0      | 0      | 0      | 0     | 0      | 0      | 1     | 0      | 0     | dfmo0725_085     |
| 350 | 260       | Fungi                 | Glomeromycota |                   |                         | 0      | 0      | 0     | 0      | 0      | 0      | 0      | 0      | 0      | 0     | 0      | 0      | 1     | 0      | 0     | dfmo0725_087     |
| 351 | 301       | Fungi                 | Basidiomycota |                   |                         | 0      | 0      | 0     | 0      | 0      | 0      | 0      | 0      | 0      | 0     | 0      | 0      | 1     | 0      | 0     | dfmo0725_088     |
| 352 | 303       | Fungi                 | Basidiomycota |                   |                         | 0      | 0      | 0     | 0      | 0      | 0      | 0      | 0      | 0      | 0     | 0      | 0      | 1     | 0      | 0     | dfmo0725_089     |
| 353 | 886       | Fungi                 | Basidiomycota | Tremellales       |                         | 0      | 0      | 0     | 0      | 0      | 0      | 0      | 0      | 0      | 0     | 0      | 0      | 1     | 0      | 0     | dfmo0725_090     |
| 354 | 1043      | Fungi                 | Basidiomycota | Thelephorales     |                         | 0      | 0      | 0     | 0      | 0      | 0      | 0      | 0      | 0      | 0     | 0      | 0      | 1     | 0      | 0     | dfmo0725_093     |
| 355 | 1086      | Fungi                 | Basidiomycota |                   |                         | 0      | 0      | 0     | 0      | 0      | 0      | 0      | 0      | 0      | 0     | 0      | 0      | 1     | 0      | 0     | dfmo0725_095     |
| 356 | 1158      | Fungi                 | Basidiomycota | Russulales        | <i>Russula</i>          | 0      | 0      | 0     | 0      | 0      | 0      | 0      | 0      | 0      | 0     | 0      | 0      | 1     | 0      | 0     | dfmo0725_100     |
| 357 | 280       | Fungi                 | Basidiomycota |                   |                         | 0      | 0      | 0     | 0      | 0      | 0      | 0      | 0      | 0      | 0     | 0      | 0      | 1     | 0      | 0     | dfmo0725_101     |
| 358 | 856       | Fungi                 | Ascomycota    | Eurotiomycetidae  | <i>Penicillium</i>      | 0      | 0      | 0     | 0      | 0      | 0      | 0      | 0      | 0      | 0     | 0      | 0      | 1     | 0      | 0     | dfmo0725_104     |

| OTU | Bit Score | Kingdom or Subkingdom | Phylum        | Order or Subclass | Genus                 | MH-L-1 | MH-L-2 | P-L-1 | MH-O-1 | MH-O-2 | MH-O-3 | MH-O-4 | MH-O-5 | MH-O-6 | P-O-1 | MH-A-1 | MH-A-2 | P-A-1 | MH-B-1 | P-B-1 | Sequence numbers |
|-----|-----------|-----------------------|---------------|-------------------|-----------------------|--------|--------|-------|--------|--------|--------|--------|--------|--------|-------|--------|--------|-------|--------|-------|------------------|
| 359 | 264       | Fungi                 | Ascomycota    |                   |                       | 0      | 0      | 0     | 0      | 0      | 0      | 0      | 0      | 0      | 0     | 0      | 0      | 1     | 0      | 0     | dfmo0725_108     |
| 360 | 311       | Fungi                 | Basidiomycota |                   |                       | 0      | 0      | 0     | 0      | 0      | 0      | 0      | 0      | 0      | 0     | 0      | 0      | 1     | 0      | 0     | dfmo0725_110     |
| 361 | 321       | Fungi                 | Ascomycota    |                   |                       | 0      | 0      | 0     | 0      | 0      | 0      | 0      | 0      | 0      | 0     | 0      | 0      | 0     | 0      | 1     | dfmo0726_002     |
| 362 | 1067      | Fungi                 | Basidiomycota | Russulales        | <i>Russula</i>        | 0      | 0      | 0     | 0      | 0      | 0      | 0      | 0      | 0      | 0     | 0      | 0      | 0     | 0      | 1     | dfmo0726_006     |
| 363 | 159       | Fungi                 |               |                   |                       | 0      | 0      | 0     | 0      | 0      | 0      | 0      | 0      | 0      | 0     | 0      | 0      | 0     | 0      | 1     | dfmo0726_007     |
| 364 | 365       | Fungi                 | Ascomycota    |                   |                       | 0      | 0      | 0     | 0      | 0      | 0      | 0      | 0      | 0      | 0     | 0      | 0      | 0     | 0      | 1     | dfmo0726_016     |
| 365 | 557       | Fungi                 | Ascomycota    | Leotiomycetidae   |                       | 0      | 0      | 0     | 0      | 0      | 0      | 0      | 0      | 0      | 0     | 0      | 0      | 0     | 0      | 1     | dfmo0726_019     |
| 366 | 573       | Fungi                 | Ascomycota    | Pezizomycetidae   |                       | 0      | 0      | 0     | 0      | 0      | 0      | 0      | 0      | 0      | 0     | 0      | 0      | 0     | 0      | 1     | dfmo0726_020     |
| 367 | 848       | Fungi                 | Basidiomycota | Russulales        | <i>Russula</i>        | 0      | 0      | 0     | 0      | 0      | 0      | 0      | 0      | 0      | 0     | 0      | 0      | 0     | 0      | 1     | dfmo0726_022     |
| 368 | 700       | Fungi                 | Ascomycota    |                   |                       | 0      | 0      | 0     | 0      | 0      | 0      | 0      | 0      | 0      | 0     | 0      | 0      | 0     | 0      | 1     | dfmo0726_027     |
| 369 | 280       | Fungi                 | Basidiomycota |                   |                       | 0      | 0      | 0     | 0      | 0      | 0      | 0      | 0      | 0      | 0     | 0      | 0      | 0     | 0      | 1     | dfmo0726_028     |
| 370 | 1031      | Fungi                 | Basidiomycota | Sporidiales       | <i>Leucosporidium</i> | 0      | 0      | 0     | 0      | 0      | 0      | 0      | 0      | 0      | 0     | 0      | 0      | 0     | 0      | 1     | dfmo0726_032     |
| 371 | 363       | Fungi                 | Ascomycota    | Leotiomycetidae   |                       | 0      | 0      | 0     | 0      | 0      | 0      | 0      | 0      | 0      | 0     | 0      | 0      | 0     | 0      | 1     | dfmo0726_040     |
| 372 | 967       | Fungi                 | Basidiomycota | Russulales        |                       | 0      | 0      | 0     | 0      | 0      | 0      | 0      | 0      | 0      | 0     | 0      | 0      | 0     | 0      | 1     | dfmo0726_042     |
| 373 | 569       | Fungi                 | Ascomycota    | Leotiomycetidae   |                       | 0      | 0      | 0     | 0      | 0      | 0      | 0      | 0      | 0      | 0     | 0      | 0      | 0     | 0      | 1     | dfmo0726_043     |
| 374 | 343       | Fungi                 | Basidiomycota |                   |                       | 0      | 0      | 0     | 0      | 0      | 0      | 0      | 0      | 0      | 0     | 0      | 0      | 0     | 0      | 1     | dfmo0726_045     |
| 375 | 505       | Fungi                 | Basidiomycota | Polyporales       |                       | 0      | 0      | 0     | 0      | 0      | 0      | 0      | 0      | 0      | 0     | 0      | 0      | 0     | 0      | 1     | dfmo0726_048     |
| 376 | 769       | Fungi                 | Ascomycota    | Leotiomycetidae   | <i>Mycocarthritis</i> | 0      | 0      | 0     | 0      | 0      | 0      | 0      | 0      | 0      | 0     | 0      | 0      | 0     | 0      | 1     | dfmo0726_058     |
| 377 | 547       | Fungi                 | Ascomycota    | Leotiomycetidae   |                       | 0      | 0      | 0     | 0      | 0      | 0      | 0      | 0      | 0      | 0     | 0      | 0      | 0     | 0      | 1     | dfmo0726_060     |
| 378 | 622       | Fungi                 | Ascomycota    | Leotiomycetidae   |                       | 0      | 0      | 0     | 0      | 0      | 0      | 0      | 0      | 0      | 0     | 0      | 0      | 0     | 0      | 1     | dfmo0726_064     |
| 379 | 807       | Fungi                 | Basidiomycota | Tremellales       | <i>Cryptococcus</i>   | 0      | 0      | 0     | 0      | 0      | 0      | 0      | 0      | 0      | 0     | 0      | 0      | 0     | 0      | 1     | dfmo0726_068     |
| 380 | 1007      | Fungi                 | Ascomycota    | Sordariomycetidae | <i>Discostroma</i>    | 0      | 0      | 0     | 0      | 0      | 0      | 0      | 0      | 0      | 0     | 0      | 0      | 0     | 0      | 1     | dfmo0726_083     |
| 381 | 460       | Fungi                 | Ascomycota    | Leotiomycetidae   |                       | 0      | 0      | 0     | 0      | 0      | 0      | 0      | 0      | 0      | 0     | 0      | 0      | 0     | 0      | 1     | dfmo0726_091     |
| 382 | 327       | Fungi                 | Basidiomycota |                   |                       | 0      | 0      | 0     | 0      | 0      | 0      | 0      | 0      | 0      | 0     | 0      | 0      | 0     | 0      | 1     | dfmo0726_092     |
| 383 | 276       | Fungi                 | Basidiomycota |                   |                       | 0      | 0      | 0     | 0      | 0      | 0      | 0      | 0      | 0      | 0     | 0      | 0      | 0     | 0      | 1     | dfmo0726_097     |
| 384 | 62        | Fungi                 |               |                   |                       | 0      | 0      | 0     | 0      | 0      | 0      | 0      | 0      | 0      | 0     | 0      | 0      | 0     | 0      | 1     | dfmo0726_101     |
| 385 | 757       | Fungi                 | Ascomycota    | Sordariomycetidae | <i>Verticillium</i>   | 0      | 0      | 0     | 0      | 0      | 0      | 0      | 0      | 0      | 0     | 0      | 0      | 0     | 0      | 1     | dfmo0726_107     |
| 386 | 260       | Fungi                 | Ascomycota    |                   |                       | 0      | 0      | 0     | 0      | 0      | 0      | 0      | 0      | 0      | 0     | 0      | 0      | 0     | 0      | 1     | dfmo0726_114     |
| 387 | 493       | Fungi                 | Ascomycota    | Leotiomycetidae   |                       | 0      | 0      | 0     | 0      | 0      | 0      | 0      | 0      | 0      | 0     | 0      | 0      | 0     | 0      | 1     | dfmo0726_116     |
| 388 | 1199      | Fungi                 | Basidiomycota | Thelephorales     | <i>Tomentella</i>     | 0      | 0      | 0     | 0      | 0      | 0      | 0      | 0      | 0      | 0     | 0      | 0      | 0     | 0      | 1     | dfmo0726_124     |

| OTU | Bit Score | Kingdom or Subkingdom | Phylum        | Order or Subclass     | Genus               | MH-L-1 | MH-L-2 | P-L-1 | MH-O-1 | MH-O-2 | MH-O-3 | MH-O-4 | MH-O-5 | MH-O-6 | P-O-1 | MH-A-1 | MH-A-2 | P-A-1 | MH-B-1 | P-B-1 | Sequence numbers |              |
|-----|-----------|-----------------------|---------------|-----------------------|---------------------|--------|--------|-------|--------|--------|--------|--------|--------|--------|-------|--------|--------|-------|--------|-------|------------------|--------------|
| 389 | 607       | Fungi                 | Ascomycota    | Leotiomycetidae       |                     | 0      | 0      | 0     | 0      | 0      | 0      | 0      | 0      | 0      | 0     | 0      | 0      | 0     | 0      | 1     | dfmo0726_125     |              |
| 390 | 478       | Fungi                 | Ascomycota    | Eurotiomycetidae      |                     | 0      | 0      | 0     | 0      | 0      | 0      | 0      | 0      | 0      | 0     | 0      | 0      | 0     | 0      | 1     | dfmo0726_128     |              |
| 391 | 283       | Fungi                 | Ascomycota    |                       |                     | 0      | 0      | 0     | 0      | 0      | 0      | 0      | 0      | 0      | 0     | 0      | 0      | 0     | 0      | 1     | dfmo0726_129     |              |
| 392 | 303       | Fungi                 | Ascomycota    |                       |                     | 0      | 0      | 0     | 0      | 0      | 0      | 0      | 0      | 0      | 0     | 0      | 0      | 0     | 0      | 1     | dfmo0726_131     |              |
| 393 | 311       | Fungi                 | Basidiomycota |                       |                     | 0      | 0      | 0     | 0      | 0      | 0      | 0      | 0      | 0      | 0     | 1      | 0      | 0     | 0      | 0     | 0                | dfmo1059_004 |
| 394 | 244       | Fungi                 |               |                       |                     | 0      | 0      | 0     | 0      | 0      | 0      | 0      | 0      | 0      | 0     | 1      | 0      | 0     | 0      | 0     | 0                | dfmo1059_015 |
| 395 | 880       | Fungi                 | Ascomycota    | Leotiomycetidae       |                     | 0      | 0      | 0     | 0      | 0      | 0      | 0      | 0      | 0      | 0     | 1      | 0      | 0     | 0      | 0     | 0                | dfmo1059_017 |
| 396 | 581       | Fungi                 | Ascomycota    | Chaetothyriomycetidae |                     | 0      | 0      | 0     | 0      | 0      | 0      | 0      | 0      | 0      | 0     | 1      | 0      | 0     | 0      | 0     | 0                | dfmo1059_028 |
| 397 | 82        | Fungi                 |               |                       |                     | 0      | 0      | 0     | 0      | 0      | 0      | 0      | 0      | 0      | 0     | 1      | 0      | 0     | 0      | 0     | 0                | dfmo1059_040 |
| 398 | 315       | Fungi                 | Ascomycota    |                       |                     | 0      | 0      | 0     | 0      | 0      | 0      | 0      | 0      | 0      | 0     | 1      | 0      | 0     | 0      | 0     | 0                | dfmo1059_045 |
| 399 | 329       | Fungi                 | Ascomycota    |                       |                     | 0      | 0      | 0     | 0      | 0      | 0      | 0      | 0      | 0      | 0     | 1      | 0      | 0     | 0      | 0     | 0                | dfmo1059_067 |
| 400 | 90        | Metazoa               |               |                       |                     | 0      | 0      | 0     | 0      | 0      | 0      | 0      | 0      | 0      | 0     | 1      | 0      | 0     | 0      | 0     | 0                | dfmo1059_068 |
| 401 | 854       | Fungi                 | Basidiomycota | Tremellales           | <i>Cryptococcus</i> | 0      | 0      | 0     | 0      | 0      | 0      | 0      | 0      | 0      | 0     | 1      | 0      | 0     | 0      | 0     | 0                | dfmo1059_076 |
| 402 | 716       | Fungi                 | Basidiomycota | Russulales            |                     | 0      | 0      | 0     | 0      | 0      | 0      | 0      | 0      | 0      | 0     | 1      | 0      | 0     | 0      | 0     | 0                | dfmo1059_078 |
| 403 | 805       | Fungi                 | Ascomycota    | Leotiomycetidae       |                     | 0      | 0      | 0     | 0      | 0      | 0      | 0      | 0      | 0      | 0     | 1      | 0      | 0     | 0      | 0     | 0                | dfmo1059_079 |
| 404 | 862       | Fungi                 | Ascomycota    | Sordariomycetidae     | <i>Verticillium</i> | 0      | 0      | 0     | 0      | 0      | 0      | 0      | 0      | 0      | 0     | 1      | 0      | 0     | 0      | 0     | 0                | dfmo1059_083 |
| 405 | 90        | Metazoa               |               |                       |                     | 0      | 0      | 0     | 0      | 0      | 0      | 0      | 0      | 0      | 0     | 1      | 0      | 0     | 0      | 0     | 0                | dfmo1059_086 |
| 406 | 710       | Fungi                 | Ascomycota    |                       |                     | 0      | 0      | 0     | 0      | 0      | 0      | 0      | 0      | 0      | 0     | 1      | 0      | 0     | 0      | 0     | 0                | dfmo1059_092 |
| 407 | 708       | Fungi                 | Basidiomycota | Sporidiales           | <i>Rhodotorula</i>  | 0      | 0      | 0     | 0      | 0      | 0      | 0      | 0      | 0      | 0     | 1      | 0      | 0     | 0      | 0     | 0                | dfmo1059_109 |
| 408 | 609       | Fungi                 | Ascomycota    | Sordariomycetidae     | <i>Verticillium</i> | 0      | 0      | 0     | 0      | 0      | 0      | 0      | 0      | 0      | 0     | 1      | 0      | 0     | 0      | 0     | 0                | dfmo1059_118 |
| 409 | 311       | Fungi                 | Ascomycota    |                       |                     | 0      | 0      | 0     | 0      | 0      | 0      | 0      | 0      | 0      | 0     | 1      | 0      | 0     | 0      | 0     | 0                | dfmo1059_127 |
| 410 | 1199      | Fungi                 | Basidiomycota | Thelephorales         | <i>Tomentella</i>   | 0      | 0      | 0     | 0      | 0      | 0      | 0      | 0      | 0      | 0     | 0      | 1      | 0     | 0      | 0     | 0                | dfmo1059_132 |
| 411 | 305       | Fungi                 | Basidiomycota |                       |                     | 0      | 0      | 0     | 0      | 0      | 0      | 0      | 0      | 0      | 0     | 0      | 1      | 0     | 0      | 0     | 0                | dfmo1059_133 |
| 412 | 1211      | Fungi                 | Basidiomycota | Russulales            | <i>Russula</i>      | 0      | 0      | 0     | 0      | 0      | 0      | 0      | 0      | 0      | 0     | 0      | 1      | 0     | 0      | 0     | 0                | dfmo1059_142 |
| 413 | 96        | Fungi                 |               |                       |                     | 0      | 0      | 0     | 0      | 0      | 0      | 0      | 0      | 0      | 0     | 0      | 1      | 0     | 0      | 0     | 0                | dfmo1059_143 |
| 414 | 107       | Metazoa               |               |                       |                     | 0      | 0      | 0     | 0      | 0      | 0      | 0      | 0      | 0      | 0     | 0      | 1      | 0     | 0      | 0     | 0                | dfmo1059_152 |
| 415 | 410       | Fungi                 | Ascomycota    | Pezizomycetidae       |                     | 0      | 0      | 0     | 0      | 0      | 0      | 0      | 0      | 0      | 0     | 0      | 1      | 0     | 0      | 0     | 0                | dfmo1059_154 |
| 416 | 131       | Metazoa               |               |                       |                     | 0      | 0      | 0     | 0      | 0      | 0      | 0      | 0      | 0      | 0     | 0      | 1      | 0     | 0      | 0     | 0                | dfmo1059_156 |
| 417 | 291       | Fungi                 | Ascomycota    |                       |                     | 0      | 0      | 0     | 0      | 0      | 0      | 0      | 0      | 0      | 0     | 0      | 1      | 0     | 0      | 0     | 0                | dfmo1059_159 |
| 418 | 569       | Fungi                 | Ascomycota    |                       |                     | 0      | 0      | 0     | 0      | 0      | 0      | 0      | 0      | 0      | 0     | 0      | 1      | 0     | 0      | 0     | 0                | dfmo1059_160 |
| 419 | 151       | Fungi                 |               |                       |                     | 0      | 0      | 0     | 0      | 0      | 0      | 0      | 0      | 0      | 0     | 0      | 1      | 0     | 0      | 0     | 0                | dfmo1059_171 |

| OTU | Bit Score | Kingdom or Subkingdom | Phylum        | Order or Subclass  | Genus               | MH-L-1 | MH-L-2 | P-L-1 | MH-O-1 | MH-O-2 | MH-O-3 | MH-O-4 | MH-O-5 | MH-O-6 | P-O-1 | MH-A-1 | MH-A-2 | P-A-1 | MH-B-1 | P-B-1 | Sequence numbers |
|-----|-----------|-----------------------|---------------|--------------------|---------------------|--------|--------|-------|--------|--------|--------|--------|--------|--------|-------|--------|--------|-------|--------|-------|------------------|
| 420 | 270       | Fungi                 |               |                    |                     | 0      | 0      | 0     | 0      | 0      | 0      | 0      | 0      | 0      | 0     | 0      | 1      | 0     | 0      | 0     | dfmo1059_174     |
| 421 | 337       | Fungi                 | Ascomycota    |                    |                     | 0      | 0      | 0     | 0      | 0      | 0      | 0      | 0      | 0      | 0     | 0      | 1      | 0     | 0      | 0     | dfmo1059_179     |
| 422 | 321       | Fungi                 | Ascomycota    |                    |                     | 0      | 0      | 0     | 0      | 0      | 0      | 0      | 0      | 0      | 0     | 0      | 1      | 0     | 0      | 0     | dfmo1059_182     |
| 423 | 321       | Fungi                 | Ascomycota    |                    |                     | 0      | 0      | 0     | 0      | 0      | 0      | 0      | 0      | 0      | 0     | 0      | 1      | 0     | 0      | 0     | dfmo1059_184     |
| 424 | 954       | Fungi                 | Ascomycota    | Sordario-mycetidae | <i>Neonectria</i>   | 0      | 0      | 0     | 0      | 0      | 0      | 0      | 0      | 0      | 0     | 0      | 1      | 0     | 0      | 0     | dfmo1059_187     |
| 425 | 446       | Fungi                 | Ascomycota    |                    |                     | 0      | 0      | 0     | 0      | 0      | 0      | 0      | 0      | 0      | 0     | 0      | 1      | 0     | 0      | 0     | dfmo1059_190     |
| 426 | 335       | Fungi                 | Ascomycota    |                    |                     | 0      | 0      | 0     | 0      | 0      | 0      | 0      | 0      | 0      | 0     | 0      | 1      | 0     | 0      | 0     | dfmo1059_216     |
| 427 | 274       | Fungi                 | Basidiomycota |                    |                     | 0      | 0      | 0     | 0      | 0      | 0      | 0      | 0      | 0      | 0     | 0      | 1      | 0     | 0      | 0     | dfmo1059_217     |
| 428 | 914       | Fungi                 | Ascomycota    | Sordario-mycetidae |                     | 0      | 0      | 0     | 0      | 0      | 0      | 0      | 0      | 0      | 0     | 0      | 1      | 0     | 0      | 0     | dfmo1059_219     |
| 429 | 293       | Fungi                 | Basidiomycota |                    |                     | 0      | 0      | 0     | 0      | 0      | 0      | 0      | 0      | 0      | 0     | 0      | 1      | 0     | 0      | 0     | dfmo1059_220     |
| 430 | 232       | Fungi                 | Basidiomycota |                    |                     | 0      | 0      | 0     | 0      | 0      | 0      | 0      | 0      | 0      | 0     | 0      | 1      | 0     | 0      | 0     | dfmo1059_221     |
| 431 | 345       | Fungi                 | Basidiomycota |                    |                     | 0      | 0      | 0     | 0      | 0      | 0      | 0      | 0      | 0      | 0     | 0      | 1      | 0     | 0      | 0     | dfmo1059_223     |
| 432 | 571       | Fungi                 | Ascomycota    |                    |                     | 0      | 0      | 0     | 0      | 0      | 0      | 0      | 0      | 0      | 0     | 0      | 1      | 0     | 0      | 0     | dfmo1059_231     |
| 433 | 198       | Fungi                 |               |                    |                     | 0      | 0      | 0     | 0      | 0      | 0      | 0      | 0      | 0      | 0     | 0      | 1      | 0     | 0      | 0     | dfmo1059_233     |
| 434 | 341       | Fungi                 | Basidiomycota |                    |                     | 0      | 0      | 0     | 0      | 0      | 0      | 0      | 0      | 0      | 0     | 0      | 1      | 0     | 0      | 0     | dfmo1059_242     |
| 435 | 212       | Metazoa               |               |                    |                     | 0      | 0      | 0     | 0      | 0      | 0      | 0      | 0      | 0      | 0     | 0      | 1      | 0     | 0      | 0     | dfmo1059_244     |
| 436 | 359       | Fungi                 | Basidiomycota | Agaricales         |                     | 0      | 0      | 0     | 0      | 0      | 0      | 0      | 0      | 0      | 0     | 0      | 1      | 0     | 0      | 0     | dfmo1059_246     |
| 437 | 121       | Fungi                 |               |                    |                     | 0      | 0      | 0     | 0      | 0      | 0      | 0      | 0      | 0      | 0     | 0      | 1      | 0     | 0      | 0     | dfmo1059_252     |
| 438 | 327       | Fungi                 | Basidiomycota |                    |                     | 0      | 0      | 0     | 0      | 0      | 0      | 0      | 0      | 0      | 0     | 0      | 1      | 0     | 0      | 0     | dfmo1059_254     |
| 439 | 603       | Fungi                 | Ascomycota    | Pezizo-mycetidae   |                     | 0      | 0      | 0     | 0      | 0      | 0      | 0      | 0      | 0      | 0     | 0      | 0      | 0     | 1      | 0     | dfmo1060_004     |
| 440 | 278       | Fungi                 | Ascomycota    |                    |                     | 0      | 0      | 0     | 0      | 0      | 0      | 0      | 0      | 0      | 0     | 0      | 0      | 0     | 1      | 0     | dfmo1060_007     |
| 441 | 331       | Fungi                 | Ascomycota    |                    |                     | 0      | 0      | 0     | 0      | 0      | 0      | 0      | 0      | 0      | 0     | 0      | 0      | 0     | 1      | 0     | dfmo1060_022     |
| 442 | 432       | Fungi                 |               |                    |                     | 0      | 0      | 0     | 0      | 0      | 0      | 0      | 0      | 0      | 0     | 0      | 0      | 0     | 1      | 0     | dfmo1060_026     |
| 443 | 521       | Fungi                 | Ascomycota    | Leotio-mycetidae   |                     | 0      | 0      | 0     | 0      | 0      | 0      | 0      | 0      | 0      | 0     | 0      | 0      | 0     | 1      | 0     | dfmo1060_028     |
| 444 | 831       | Fungi                 | Ascomycota    | Sordario-mycetidae | <i>Verticillium</i> | 0      | 0      | 0     | 0      | 0      | 0      | 0      | 0      | 0      | 0     | 0      | 0      | 0     | 1      | 0     | dfmo1060_029     |
| 445 | 954       | Fungi                 | Ascomycota    | Dothidio-mycetidae | <i>Phoma</i>        | 0      | 0      | 0     | 0      | 0      | 0      | 0      | 0      | 0      | 0     | 0      | 0      | 0     | 1      | 0     | dfmo1060_037     |
| 446 | 88        | Metazoa               |               |                    |                     | 0      | 0      | 0     | 0      | 0      | 0      | 0      | 0      | 0      | 0     | 0      | 0      | 0     | 1      | 0     | dfmo1060_040     |
| 447 | 90        | Metazoa               |               |                    |                     | 0      | 0      | 0     | 0      | 0      | 0      | 0      | 0      | 0      | 0     | 0      | 0      | 0     | 1      | 0     | dfmo1060_044     |
| 448 | 967       | Fungi                 | Ascomycota    | Dothidio-mycetidae | <i>Epicoccum</i>    | 0      | 0      | 0     | 0      | 0      | 0      | 0      | 0      | 0      | 0     | 0      | 0      | 0     | 1      | 0     | dfmo1060_048     |
| 449 | 680       | Fungi                 | Ascomycota    |                    |                     | 0      | 0      | 0     | 0      | 0      | 0      | 0      | 0      | 0      | 0     | 0      | 0      | 0     | 1      | 0     | dfmo1060_063     |
| 450 | 315       | Fungi                 | Basidiomycota |                    |                     | 0      | 0      | 0     | 0      | 0      | 0      | 0      | 0      | 0      | 0     | 0      | 0      | 0     | 1      | 0     | dfmo1060_065     |
| 451 | 319       | Fungi                 | Basidiomycota |                    |                     | 0      | 0      | 0     | 0      | 0      | 0      | 0      | 0      | 0      | 0     | 0      | 0      | 0     | 1      | 0     | dfmo1060_068     |

| OTU | Bit Score | Kingdom or Subkingdom | Phylum        | Order or Subclass | Genus               | MH-L-1 | MH-L-2 | P-L-1 | MH-O-1 | MH-O-2 | MH-O-3 | MH-O-4 | MH-O-5 | MH-O-6 | P-O-1 | MH-A-1 | MH-A-2 | P-A-1 | MH-B-1 | P-B-1 | Sequence numbers |
|-----|-----------|-----------------------|---------------|-------------------|---------------------|--------|--------|-------|--------|--------|--------|--------|--------|--------|-------|--------|--------|-------|--------|-------|------------------|
| 452 | 321       | Fungi                 | Ascomycota    |                   |                     | 0      | 0      | 0     | 0      | 0      | 0      | 0      | 0      | 0      | 0     | 0      | 0      | 0     | 1      | 0     | dfmo1060_071     |
| 453 | 846       | Fungi                 | Basidiomycota | Tremellales       | <i>Cryptococcus</i> | 0      | 0      | 0     | 0      | 0      | 0      | 0      | 0      | 0      | 0     | 0      | 0      | 0     | 1      | 0     | dfmo1060_081     |
| 454 | 101       | Alveolata             |               |                   |                     | 0      | 0      | 0     | 0      | 0      | 0      | 0      | 0      | 0      | 0     | 0      | 0      | 0     | 1      | 0     | dfmo1060_085     |
