# Supplementary material
Source: PubMed Central journal article supplement (PMC1214672)
Supplement: aem_71_9_5544__2.pdf [file aem_71_9_5544__2.pdf]

**Table S2: Identity of SSU OTUs (100% similarity) and distribution across libraries**

| OTU | Bit Score | Kingdom or Subkingdom | Phylum        | Order or Subclass     | Genus             | P | MH | Sequence numbers                                                                                                                                                       |
|-----|-----------|-----------------------|---------------|-----------------------|-------------------|---|----|------------------------------------------------------------------------------------------------------------------------------------------------------------------------|
| 001 | 1923      | Fungi                 | Ascomycota    | Leotiomycetidae       | Bulgaria          | 7 | 5  | dfmo4344_009, dfmo4344_036, dfmo4344_044, dfmo4344_060, dfmo4344_065, dfmo4345_039, dfmo4345_055, dfmo4345_057, dfmo4345_068, dfmo4345_074, dfmo4345_079, dfmo4345_102 |
| 002 | 1429      | Fungi                 | Basidiomycota | Agaricales            | Inocybe           | 4 | 0  | dfmo4345_031, dfmo4345_072, dfmo4345_108, dfmo4345_109                                                                                                                 |
| 003 | 1398      | Fungi                 | Basidiomycota | Agaricales            | Panellus          | 1 | 2  | dfmo4344_025, dfmo4344_076, dfmo4345_059                                                                                                                               |
| 004 | 1457      | Fungi                 | Basidiomycota | Russulales            | Russula           | 3 | 0  | dfmo4345_005, dfmo4345_007, dfmo4345_056                                                                                                                               |
| 005 | 1788      | Fungi                 | Ascomycota    | Leotiomycetidae       | Mycoarthris       | 0 | 2  | dfmo4344_011, dfmo4344_068                                                                                                                                             |
| 006 | 1199      | Fungi                 | Glomeromycota | Glomales              | Glomus            | 0 | 2  | dfmo4344_031, dfmo4344_032                                                                                                                                             |
| 007 | 1247      | Fungi                 | Basidiomycota | Polyporales           | Poria             | 0 | 2  | dfmo4344_056, dfmo4344_057                                                                                                                                             |
| 008 | 1320      | Fungi                 | Ascomycota    | Eurotiomycetidae      | Ajellomyces       | 0 | 2  | dfmo4344_021, dfmo4344_101                                                                                                                                             |
| 009 | 1435      | Plantae               | Embryophyta   |                       | Pinus             | 0 | 2  | dfmo4344_062, dfmo4344_064                                                                                                                                             |
| 010 | 1447      | Fungi                 | Ascomycota    | Sordariomycetidae     | Hypocrea          | 1 | 1  | dfmo4344_051, dfmo4345_012                                                                                                                                             |
| 011 | 1156      | Metazoa               | Arthropoda    |                       | Xenillus          | 2 | 0  | dfmo4345_030, dfmo4345_033                                                                                                                                             |
| 012 | 1346      | Fungi                 | Basidiomycota | Polyporales           | Dendrocorticium   | 1 | 1  | dfmo4344_096, dfmo4345_028                                                                                                                                             |
| 013 | 1382      | Fungi                 | Ascomycota    | Dothidiomycetidae     | Paraphaeosphaeria | 0 | 2  | dfmo4344_024, dfmo4344_102                                                                                                                                             |
| 014 | 1318      | Fungi                 | Ascomycota    | Chaetothyriomycetidae | Cladophialophora  | 2 | 0  | dfmo4345_049, dfmo4345_092                                                                                                                                             |
| 015 | 1985      | Fungi                 | Basidiomycota | Agaricales            | Ossicaulis        | 0 | 1  | dfmo4344_001                                                                                                                                                           |
| 016 | 1740      | Fungi                 | Basidiomycota | Agaricales            | Panellus          | 0 | 1  | dfmo4344_002                                                                                                                                                           |
| 017 | 1958      | Fungi                 | Ascomycota    | Leotiomycetidae       | Bulgaria          | 0 | 1  | dfmo4344_003                                                                                                                                                           |
| 018 | 1757      | Fungi                 | Ascomycota    | Pezizomycetidae       | Pseudoplectania   | 0 | 1  | dfmo4344_006                                                                                                                                                           |
| 019 | 1744      | Metazoa               | Nematoda      |                       | Xiphinema         | 0 | 1  | dfmo4344_007                                                                                                                                                           |
| 020 | 1220      | Fungi                 | Ascomycota    | Eurotiomycetidae      | Ajellomyces       | 0 | 1  | dfmo4344_010                                                                                                                                                           |
| 021 | 1627      | Fungi                 | Ascomycota    | Pezizomycetidae       | Rhizina           | 0 | 1  | dfmo4344_012                                                                                                                                                           |
| 022 | 710       | Alveolata             | Apicomplexa   |                       | Ophriocystis      | 0 | 1  | dfmo4344_017                                                                                                                                                           |
| 023 | 880       | Metazoa               | Nematoda      |                       | Trefusia          | 0 | 1  | dfmo4344_019                                                                                                                                                           |
| 024 | 1380      | Fungi                 | Ascomycota    | Dothidiomycetidae     | Phaeotrichum      | 0 | 1  | dfmo4344_020                                                                                                                                                           |
| 025 | 1322      | Fungi                 | Ascomycota    | Leotiomycetidae       | Bulgaria          | 0 | 1  | dfmo4344_022                                                                                                                                                           |
| 026 | 1396      | Fungi                 | Basidiomycota | Agaricales            | Inocybe           | 0 | 1  | dfmo4344_023                                                                                                                                                           |
| 027 | 1344      | Fungi                 | Basidiomycota | Agaricales            | Panellus          | 0 | 1  | dfmo4344_026                                                                                                                                                           |
| 028 | 1417      | Fungi                 | Ascomycota    | Dothidiomycetidae     | Epipolaeum        | 0 | 1  | dfmo4344_027                                                                                                                                                           |
| 029 | 1380      | Fungi                 | Ascomycota    | Leotiomycetidae       | Mycoarthris       | 0 | 1  | dfmo4344_029                                                                                                                                                           |
| 030 | 1384      | Fungi                 | Ascomycota    | Sordariomycetidae     | Leucostoma        | 0 | 1  | dfmo4344_033                                                                                                                                                           |
| 031 | 1431      | Fungi                 | Basidiomycota | Tremellales           | Cryptococcus      | 0 | 1  | dfmo4344_034                                                                                                                                                           |
| 032 | 1326      | Fungi                 | Ascomycota    | Chaetothyriomycetidae | Cladophialophora  | 0 | 1  | dfmo4344_035                                                                                                                                                           |
| 033 | 1306      | Fungi                 | Ascomycota    | Leotiomycetidae       | Bulgaria          | 0 | 1  | dfmo4344_037                                                                                                                                                           |
| 034 | 1396      | Fungi                 | Ascomycota    | Pezizomycetidae       | Pseudoplectania   | 0 | 1  | dfmo4344_038                                                                                                                                                           |

| OTU | Bit Score | Kingdom or Subkingdom | Phylum          | Order or Subclass | Genus           | P | MH | Sequence numbers |
|-----|-----------|-----------------------|-----------------|-------------------|-----------------|---|----|------------------|
| 035 | 967       | Fungi                 | Chytridiomycota | Chytridiales      | Rhizophydium    | 0 | 1  | dfmo4344_039     |
| 036 | 1390      | Fungi                 | Basidiomycota   | Agaricales        | Calvatia        | 0 | 1  | dfmo4344_041     |
| 037 | 1152      | Alveolata             |                 |                   | Nyctotherus     | 0 | 1  | dfmo4344_043     |
| 038 | 1435      | Fungi                 | Ascomycota      | Sordariomycetidae | Myrothecium     | 0 | 1  | dfmo4344_045     |
| 039 | 1312      | Fungi                 | Basidiomycota   | Polyporales       | Sistotrema      | 0 | 1  | dfmo4344_046     |
| 040 | 1320      | Fungi                 | Zygomycota      | Mortierellales    | Mortierella     | 0 | 1  | dfmo4344_048     |
| 041 | 1346      | Fungi                 | Basidiomycota   | Agaricales        | Panellus        | 0 | 1  | dfmo4344_049     |
| 042 | 1392      | Fungi                 | Basidiomycota   | Agaricales        | Calvatia        | 0 | 1  | dfmo4344_050     |
| 043 | 1400      | Fungi                 | Basidiomycota   | Polyporales       | Tyromyces       | 0 | 1  | dfmo4344_052     |
| 044 | 1384      | Fungi                 | Basidiomycota   | Russulales        | Russula         | 0 | 1  | dfmo4344_053     |
| 045 | 1376      | Fungi                 | Basidiomycota   | Sporidiales       | Rhodotorula     | 0 | 1  | dfmo4344_055     |
| 046 | 1350      | Fungi                 | Zygomycota      | Mortierellales    | Umbelopsis      | 0 | 1  | dfmo4344_059     |
| 047 | 880       | Rhizaria              | Cercozoa        |                   | Massisteria     | 0 | 1  | dfmo4344_061     |
| 048 | 1268      | Fungi                 | Ascomycota      | Eurotiomycetidae  | Ajellomyces     | 0 | 1  | dfmo4344_063     |
| 049 | 1445      | Fungi                 | Ascomycota      | Sordariomycetidae | Leucostoma      | 0 | 1  | dfmo4344_066     |
| 050 | 1411      | Fungi                 | Basidiomycota   | Agaricales        | Calvatia        | 0 | 1  | dfmo4344_067     |
| 051 | 1400      | Fungi                 | Ascomycota      | Sordariomycetidae | Hyponectria     | 0 | 1  | dfmo4344_070     |
| 052 | 1291      | Metazoa               | Arthropoda      |                   | Xenillus        | 0 | 1  | dfmo4344_071     |
| 053 | 1398      | Plantae               | Embryophyta     |                   | Pinus           | 0 | 1  | dfmo4344_072     |
| 054 | 1447      | Fungi                 | Ascomycota      | Dothidiomycetidae | Epipolaeum      | 0 | 1  | dfmo4344_073     |
| 055 | 1350      | Fungi                 | Basidiomycota   | Agaricales        | Calvatia        | 0 | 1  | dfmo4344_074     |
| 056 | 1289      | Fungi                 | Ascomycota      | Sordariomycetidae | Acremonium      | 0 | 1  | dfmo4344_075     |
| 057 | 1425      | Fungi                 | Ascomycota      | Dothidiomycetidae | Epipolaeum      | 0 | 1  | dfmo4344_079     |
| 058 | 1423      | Fungi                 | Basidiomycota   | Agaricales        | Inocybe         | 0 | 1  | dfmo4344_080     |
| 059 | 1447      | Fungi                 | Ascomycota      | Dothidiomycetidae | Melanomma       | 0 | 1  | dfmo4344_081     |
| 060 | 1221      | Fungi                 | Chytridiomycota | Spizellomycetales | Spizellomyces   | 0 | 1  | dfmo4344_082     |
| 061 | 1396      | Fungi                 | Basidiomycota   | Agaricales        | Panellus        | 0 | 1  | dfmo4344_083     |
| 062 | 1023      | Fungi                 | Ascomycota      | Ostropales        | Cyanoderrella   | 0 | 1  | dfmo4344_085     |
| 063 | 1306      | Fungi                 | Ascomycota      | Sordariomycetidae | Cryphonectria   | 0 | 1  | dfmo4344_086     |
| 064 | 1380      | Fungi                 | Basidiomycota   | Agaricales        | Calvatia        | 0 | 1  | dfmo4344_087     |
| 065 | 1451      | Fungi                 | Ascomycota      | Sordariomycetidae | Pestalotiopsis  | 0 | 1  | dfmo4344_088     |
| 066 | 1324      | Fungi                 | Basidiomycota   | Polyporales       | Dendrocorticium | 0 | 1  | dfmo4344_090     |
| 067 | 1390      | Fungi                 | Zygomycota      | Mortierellales    | Mortierella     | 0 | 1  | dfmo4344_092     |
| 068 | 1148      | Alveolata             |                 |                   | Ophriocystis    | 0 | 1  | dfmo4344_093     |
| 069 | 1404      | Fungi                 | Ascomycota      | Sordariomycetidae | Hyponectria     | 0 | 1  | dfmo4344_094     |
| 070 | 1058      | Rhizaria              | Cercozoa        |                   | Cercomonas      | 0 | 1  | dfmo4344_095     |
| 071 | 1372      | Fungi                 | Basidiomycota   | Agaricales        | Panellus        | 0 | 1  | dfmo4344_097     |

| OTU | Bit Score | Kingdom or Subkingdom | Phylum          | Order or Subclass | Genus           | P | MH | Sequence numbers |
|-----|-----------|-----------------------|-----------------|-------------------|-----------------|---|----|------------------|
| 072 | 1225      | Rhizaria              | Cercozoa        |                   | Paulinella      | 0 | 1  | dfmo4344_098     |
| 073 | 447       | Sarcomastigota        | Amoebozoa       |                   | Gephyramoeba    | 0 | 1  | dfmo4344_099     |
| 074 | 1237      | Metazoa               | Arthropoda      |                   | Hypogastrura    | 0 | 1  | dfmo4344_100     |
| 075 | 1259      | Fungi                 | Chytridiomycota | Spizellomycetales | Powellomyces    | 0 | 1  | dfmo4344_103     |
| 076 | 1378      | Fungi                 | Ascomycota      | Sordariomycetidae | Hyponectria     | 0 | 1  | dfmo4344_104     |
| 077 | 1300      | Alveolata             |                 |                   | Blepharisma     | 1 | 0  | dfmo4345_001     |
| 078 | 1060      | Rhizaria              | Cercozoa        |                   | Heteromita      | 1 | 0  | dfmo4345_002     |
| 079 | 1332      | Fungi                 | Zygomycota      | Mortierellales    | Mortierella     | 1 | 0  | dfmo4345_003     |
| 080 | 760       | Rhizaria              | Cercozoa        |                   | Heteromita      | 1 | 0  | dfmo4345_004     |
| 081 | 1005      | Metazoa               | Gastrotricha    |                   | Chaetonotus     | 1 | 0  | dfmo4345_006     |
| 082 | 1291      | Metazoa               | Nematoda        |                   | Xiphinema       | 1 | 0  | dfmo4345_008     |
| 083 | 1360      | Fungi                 | Basidiomycota   | Thelephorales     | Thelephora      | 1 | 0  | dfmo4345_009     |
| 084 | 1172      | Fungi                 | Ascomycota      | Pezizomycetidae   | Tuber           | 1 | 0  | dfmo4345_010     |
| 085 | 1241      | Rhizaria              | Cercozoa        |                   | Cercomonas      | 1 | 0  | dfmo4345_013     |
| 086 | 1360      | Fungi                 | Basidiomycota   | Russulales        | Russula         | 1 | 0  | dfmo4345_014     |
| 087 | 1338      | Alveolata             |                 |                   | Ophriocystis    | 1 | 0  | dfmo4345_015     |
| 088 | 904       | Fungi                 | Ascomycota      | Pezizomycetidae   | Rhizina         | 1 | 0  | dfmo4345_016     |
| 089 | 957       | Fungi                 | Ascomycota      | Leotiomycetidae   | Rhytisma        | 1 | 0  | dfmo4345_017     |
| 090 | 1005      | Sarcomastigota        | Choanozoa       |                   | Monosiga        | 1 | 0  | dfmo4345_018     |
| 091 | 1027      | Fungi                 | Basidiomycota   | Agaricales        | Panellus        | 1 | 0  | dfmo4345_019     |
| 092 | 743       | Fungi                 | Ascomycota      | Dothidiomycetidae | Lojkania        | 1 | 0  | dfmo4345_020     |
| 093 | 1152      | Fungi                 | Basidiomycota   | Agaricales        | Panellus        | 1 | 0  | dfmo4345_021     |
| 094 | 1398      | Fungi                 | Basidiomycota   | Agaricales        | Panellus        | 1 | 0  | dfmo4345_022     |
| 095 | 1281      | Metazoa               | Arthropoda      |                   | Lepto thorax    | 1 | 0  | dfmo4345_024     |
| 096 | 1197      | Fungi                 | Basidiomycota   | Agaricales        | Calvatia        | 1 | 0  | dfmo4345_025     |
| 097 | 779       | Sarcomastigota        | Amoebozoa       |                   | Saccamoeba      | 1 | 0  | dfmo4345_026     |
| 098 | 1205      | Metazoa               | Nematoda        |                   | Xiphinema       | 1 | 0  | dfmo4345_027     |
| 099 | 1429      | Fungi                 | Basidiomycota   | Trichosporonales  | Cryptococcus    | 1 | 0  | dfmo4345_029     |
| 100 | 1112      | Metazoa               | Nematoda        |                   | Paracanthochus  | 1 | 0  | dfmo4345_034     |
| 101 | 1330      | Fungi                 | Zygomycota      | Mucorales         | Gongronella     | 1 | 0  | dfmo4345_035     |
| 102 | 1366      | Fungi                 | Basidiomycota   | Agaricales        | Inocybe         | 1 | 0  | dfmo4345_036     |
| 103 | 1053      | Fungi                 | Basidiomycota   | Agaricales        | Panellus        | 1 | 0  | dfmo4345_038     |
| 104 | 1411      | Fungi                 | Basidiomycota   | Agaricales        | Panellus        | 1 | 0  | dfmo4345_040     |
| 105 | 1201      | Fungi                 | Chytridiomycota | Spizellomycetales | Spizellomyces   | 1 | 0  | dfmo4345_041     |
| 106 | 1243      | Fungi                 | Basidiomycota   | Agaricales        | Lepiota         | 1 | 0  | dfmo4345_042     |
| 107 | 1116      | Fungi                 | Basidiomycota   | Polyporales       | Limnoperdon     | 1 | 0  | dfmo4345_043     |
| 108 | 1138      | Metazoa               | Arthropoda      |                   | Nehypochthonius | 1 | 0  | dfmo4345_044     |

| OTU | Bit Score | Kingdom or Subkingdom | Phylum          | Order or Subclass | Genus             | P | MH | Sequence numbers |
|-----|-----------|-----------------------|-----------------|-------------------|-------------------|---|----|------------------|
| 109 | 1350      | Fungi                 | Basidiomycota   | Russulales        | Hericium          | 1 | 0  | dfmo4345_046     |
| 110 | 1300      | Fungi                 | Ascomycota      | Leotiomycetidae   | Bulgaria          | 1 | 0  | dfmo4345_047     |
| 111 | 1223      | Fungi                 | Basidiomycota   | Agaricales        | Panellus          | 1 | 0  | dfmo4345_048     |
| 112 | 1320      | Fungi                 | Chytridiomycota | Spizellomycetales | Powellomyces      | 1 | 0  | dfmo4345_050     |
| 113 | 1049      | Fungi                 | Basidiomycota   | Polyporales       | Poria             | 1 | 0  | dfmo4345_051     |
| 114 | 949       | Rhizaria              | Cercozoa        |                   | Euglypha          | 1 | 0  | dfmo4345_052     |
| 115 | 1453      | Fungi                 | Basidiomycota   | Cantharellales    | Laccaria          | 1 | 0  | dfmo4345_053     |
| 116 | 1423      | Plantae               | Embryophyta     |                   | Pinus             | 1 | 0  | dfmo4345_058     |
| 117 | 755       | Metazoa               | Nematoda        |                   | Trefusia          | 1 | 0  | dfmo4345_060     |
| 118 | 1429      | Fungi                 | Ascomycota      | Pezizomycetidae   | Lasiobolus        | 1 | 0  | dfmo4345_061     |
| 119 | 1237      | Fungi                 | Basidiomycota   | Agaricales        | Panellus          | 1 | 0  | dfmo4345_063     |
| 120 | 1368      | Fungi                 | Ascomycota      | Leotiomycetidae   | Bulgaria          | 1 | 0  | dfmo4345_064     |
| 121 | 1227      | Fungi                 | Basidiomycota   | Agaricales        | Panellus          | 1 | 0  | dfmo4345_065     |
| 122 | 1330      | Fungi                 | Basidiomycota   | Polyporales       | Trechispora       | 1 | 0  | dfmo4345_067     |
| 123 | 951       | Metazoa               | Tardigrada      |                   | Macrobiotus       | 1 | 0  | dfmo4345_069     |
| 124 | 1251      | Fungi                 | Basidiomycota   | Agaricales        | Panellus          | 1 | 0  | dfmo4345_070     |
| 125 | 1394      | Fungi                 | Basidiomycota   | Thelephorales     | Thelephora        | 1 | 0  | dfmo4345_071     |
| 126 | 797       | Fungi                 | Ascomycota      | Saccharomycetidae | Candida           | 1 | 0  | dfmo4345_073     |
| 127 | 1312      | Fungi                 | Chytridiomycota | Spizellomycetales | Powellomyces      | 1 | 0  | dfmo4345_075     |
| 128 | 1332      | Fungi                 | Ascomycota      | Lecanoromycetidae | Lasallia          | 1 | 0  | dfmo4345_077     |
| 129 | 1392      | Fungi                 | Zygomycota      | Mortierellales    | Mortierella       | 1 | 0  | dfmo4345_078     |
| 130 | 1451      | Fungi                 | Ascomycota      | Dothidiomycetidae | Paraphaeosphaeria | 1 | 0  | dfmo4345_080     |
| 131 | 1386      | Fungi                 | Basidiomycota   | Polyporales       | Trechispora       | 1 | 0  | dfmo4345_081     |
| 132 | 1396      | Fungi                 | Chytridiomycota | Spizellomycetales | Powellomyces      | 1 | 0  | dfmo4345_082     |
| 133 | 1119      | Fungi                 | Ascomycota      | Dothidiomycetidae | Rhytidhysteron    | 1 | 0  | dfmo4345_083     |
| 134 | 759       | Fungi                 | Ascomycota      | Dothidiomycetidae | Lojkania          | 1 | 0  | dfmo4345_084     |
| 135 | 1431      | Fungi                 | Ascomycota      | Leotiomycetidae   | Bulgaria          | 1 | 0  | dfmo4345_085     |
| 136 | 1376      | Fungi                 | Basidiomycota   | Agaricales        | Calvatia          | 1 | 0  | dfmo4345_086     |
| 137 | 854       | Alveolata             | Apicomplexa     |                   | Ophriocystis      | 1 | 0  | dfmo4345_087     |
| 138 | 734       | Fungi                 | Ascomycota      | Dothidiomycetidae | Lojkania          | 1 | 0  | dfmo4345_088     |
| 139 | 1065      | Metazoa               | Mollusca        |                   | Acila             | 1 | 0  | dfmo4345_089     |
| 140 | 1453      | Fungi                 | Zygomycota      | Mortierellales    | Umbelopsis        | 1 | 0  | dfmo4345_090     |
| 141 | 1431      | Fungi                 | Ascomycota      | Sordariomycetidae | Tolypocladium     | 1 | 0  | dfmo4345_091     |
| 142 | 1465      | Metazoa               | Nematoda        |                   | Xiphinema         | 1 | 0  | dfmo4345_094     |
| 143 | 1433      | Fungi                 | Ascomycota      | Leotiomycetidae   | Ascozonus         | 1 | 0  | dfmo4345_095     |
| 144 | 1417      | Fungi                 | Basidiomycota   | Russulales        | Russula           | 1 | 0  | dfmo4345_096     |
| 145 | 1409      | Fungi                 | Basidiomycota   | Agaricales        | Panellus          | 1 | 0  | dfmo4345_097     |

| OTU | Bit Score | Kingdom or Subkingdom | Phylum        | Order or Subclass | Genus           | P | MH | Sequence numbers |
|-----|-----------|-----------------------|---------------|-------------------|-----------------|---|----|------------------|
| 146 | 1958      | Fungi                 | Ascomycota    | Leotiomycetidae   | Bulgaria        | 1 | 0  | dfmo4345_098     |
| 147 | 1296      | Fungi                 | Basidiomycota | Polyporales       | Dendrocorticium | 1 | 0  | dfmo4345_099     |
| 148 | 787       | Metazoa               | Nematoda      |                   | Trefusia        | 1 | 0  | dfmo4345_100     |
| 149 | 1459      | Plantae               | Embryophyta   |                   | Altingia        | 1 | 0  | dfmo4345_101     |
| 150 | 1398      | Fungi                 | Basidiomycota | Thelephorales     | Thelephora      | 1 | 0  | dfmo4345_103     |
| 151 | 1429      | Fungi                 | Basidiomycota | Ceratobasidiales  | Rhizoctonia     | 1 | 0  | dfmo4345_104     |
| 152 | 989       | Metazoa               | Gastrotricha  |                   | Aspidiophorus   | 1 | 0  | dfmo4345_106     |
| 153 | 1223      | Metazoa               | Arthropoda    |                   | Sphaeridia      | 1 | 0  | dfmo4345_107     |
